# Supplementary material
Source: PubMed Central journal article supplement (PMC3774116)
Supplement: NIHMS497540-supplement-Supplementary_Figures_and_Tables.pdf [file NIHMS497540-supplement-Supplementary_Figures_and_Tables.pdf]

# Supplementary Figure S1

**A**

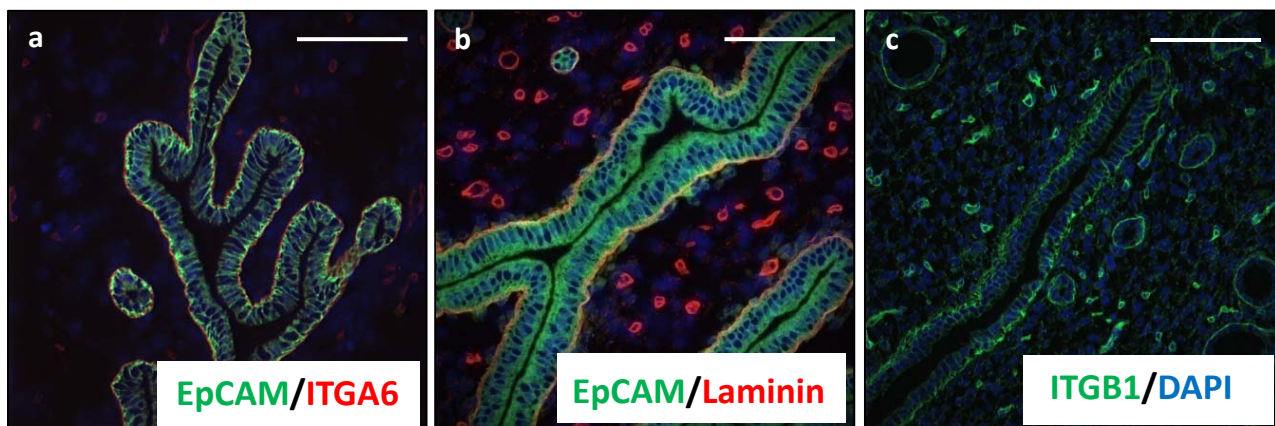

**B**

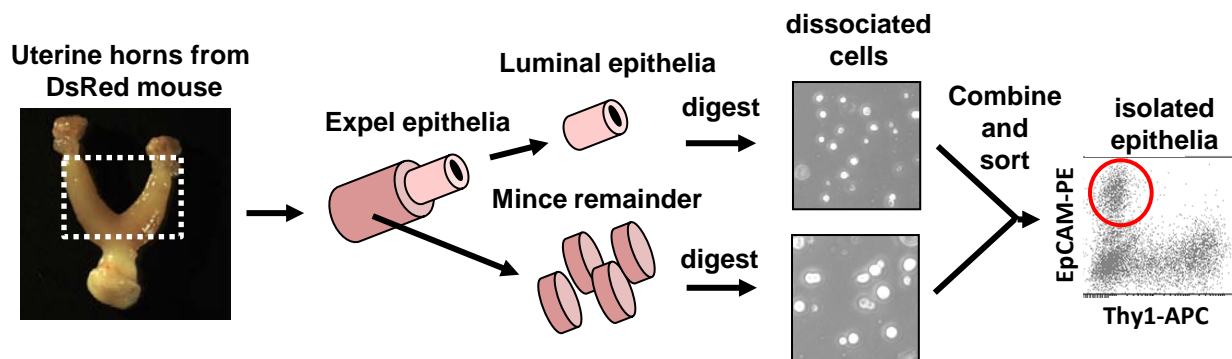

**C**

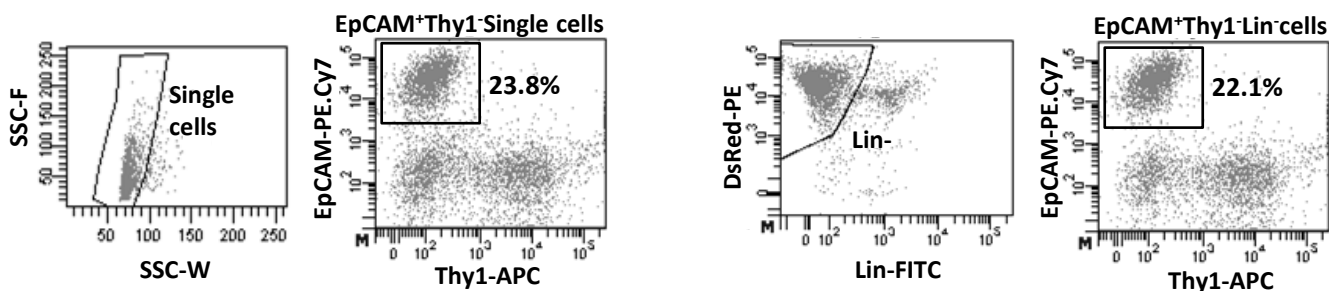

**D**

| Mouse | Day |     |     |    |   |    |    |     |     |    |    |    |     |    |     |     |    |    |    |    |    |    |    |    |
|-------|-----|-----|-----|----|---|----|----|-----|-----|----|----|----|-----|----|-----|-----|----|----|----|----|----|----|----|----|
|       | 1   | 2   | 3   | 4  | 5 | 6  | 7  | 8   | 9   | 10 | 11 | 12 | 13  | 14 | 15  | 16  | 17 | 18 | 19 | 20 | 21 | 22 | 23 | 24 |
| 1     | N   | LN  | LNC | NC | C | C  | C  | C   | C   | C  | C  | C  | C   | L  | LN  | LNC | NC | C  | C  | L  | NC | NC | NC | C  |
| 2     | NC  | L   | LNC | NC | C | L  | L  | LNC | LNC | C  | CL | L  | LN  | NC | LNC | NC  | C  | C  | L  | NC | NC | NC | C  | C  |
| 3     | LNC | LNC | LNC | C  | C | L  | L  | LNC | NC  | C  | C  | L  | LNC | NC | C   | C   | C  | C  | L  | NC | NC | NC | C  | C  |
| 4     | LN  | LN  | NC  | C  | C | LN | LN | LN  | NC  | C  | CL | LN | LN  | LN | LN  | LN  | LN | NC | C  | L  | L  | LN | LN | LN |
| 5     | NC  | LN  | LN  | NC | C | LN | LN | LN  | NC  | C  | CL | L  | LN  | LN | LNC | C   | C  | L  | LN | NC | NC | C  | C  | C  |

N= nucleated cells on vaginal cytology

C= cornified cells on vaginal cytology

LNC= mixture of leucocytes, nucleated and cornified cells

L= leucocytes predominantly

Proestrus

Estrus

Metaestrus

Diestrus

**E**

**EpCAM<sup>+</sup> Thy1<sup>-</sup> with neonatal stroma**

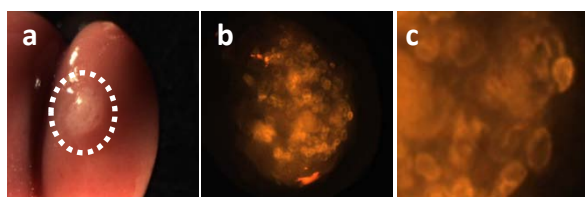

**EpCAM<sup>-</sup> Thy1<sup>+/-</sup> with neonatal stroma**

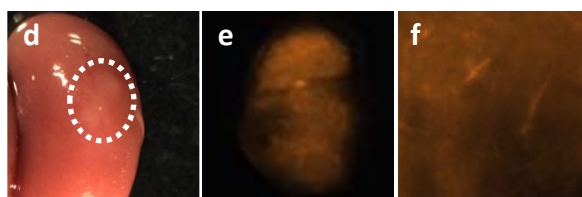

**Estimated number of progenitors based on an in vivo serial dilution assay**

| Epithelial cell source | Number cells per graft | Number grafts with glands | Average number glands per graft | Average number cells capable of Forming a gland |
|------------------------|------------------------|---------------------------|---------------------------------|-------------------------------------------------|
| Hormonally Intact      | 10,000                 | 7/7                       | 15                              | 1 in 862                                        |
|                        | 1,000                  | 7/11                      | 2                               |                                                 |
|                        | 100                    | 2/10                      | 0                               |                                                 |
|                        | 10                     | 0/2                       | 0                               |                                                 |
| Hormonally deprived    | 10,000                 | 8/8                       | 48                              | 1 in 69                                         |
|                        | 1,000                  | 10/10                     | 13                              |                                                 |
|                        | 100                    | 10/13                     | 3                               |                                                 |
|                        | 10                     | 1/6                       | 0                               |                                                 |

Hormone deprivation resulted in increased regeneration potential significantly, P <0.0001

# Supplementary Figure S3

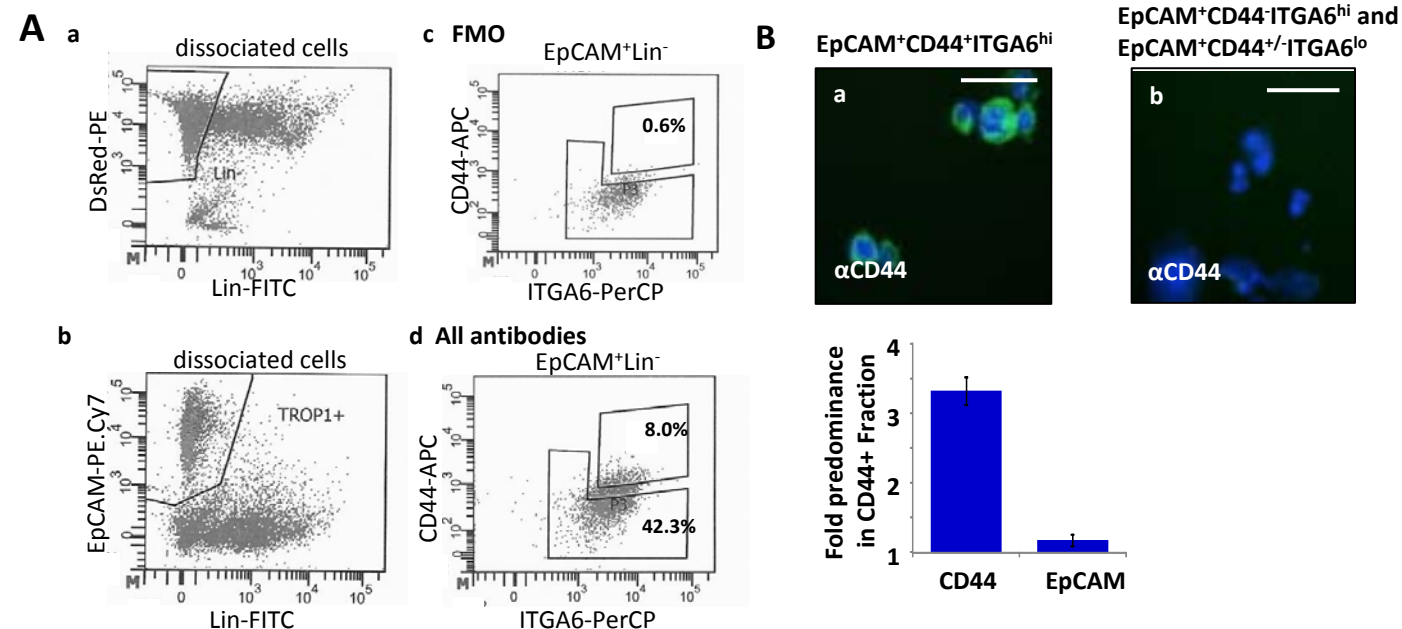

## C Native uterus

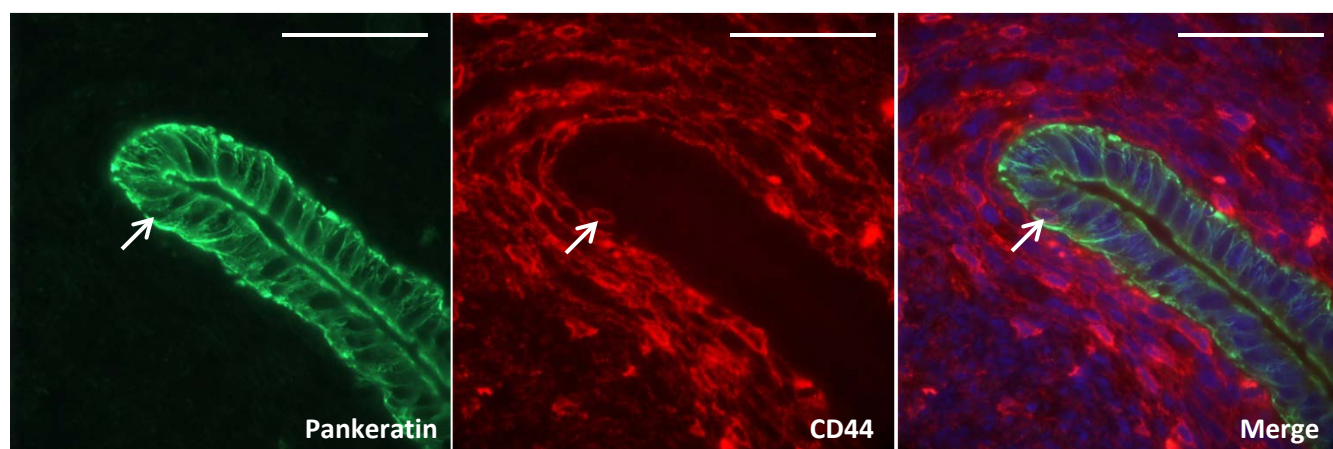

## Graft regenerated from EpCAM<sup>+</sup>CD44<sup>+</sup>ITGA6<sup>hi</sup> cells

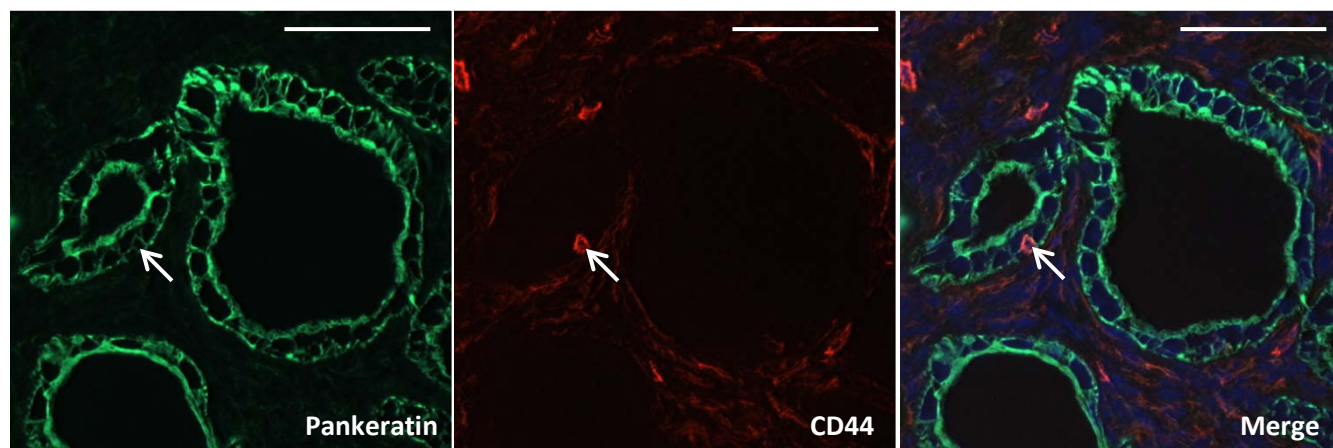

# Supplementary Figure S4

## A Cell Cycle Analysis

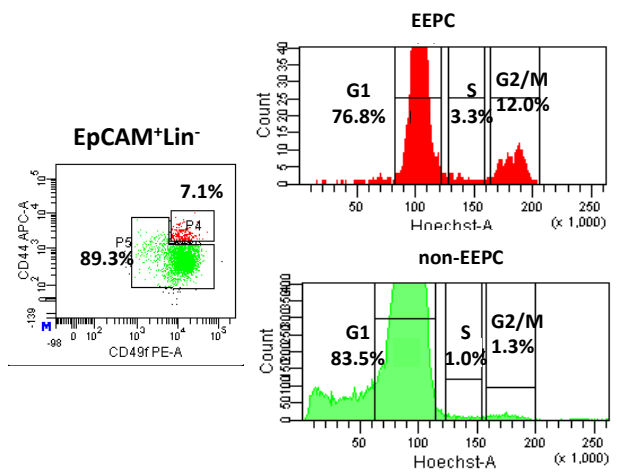

## B Proliferation Analysis with Ki67

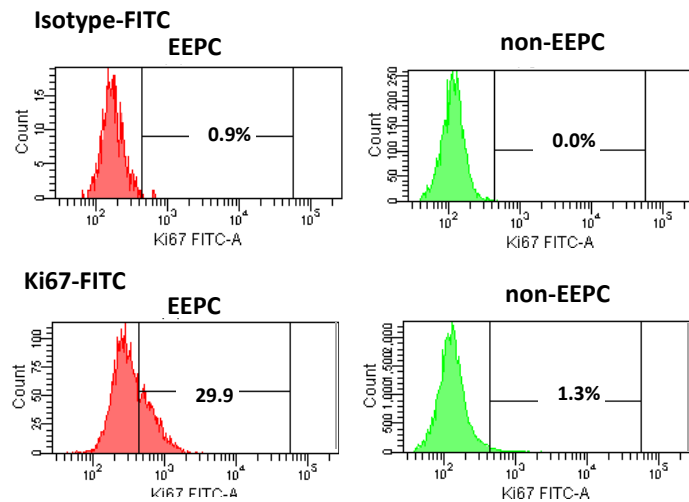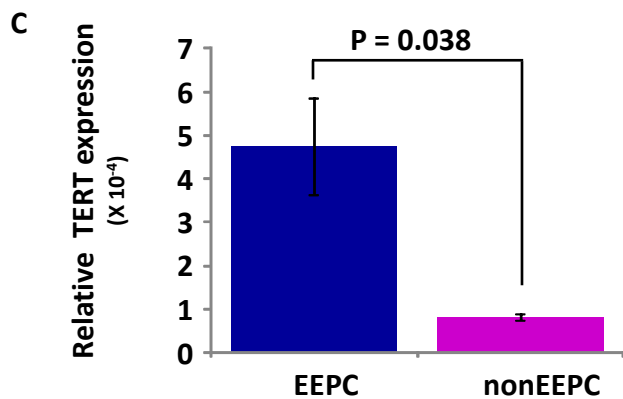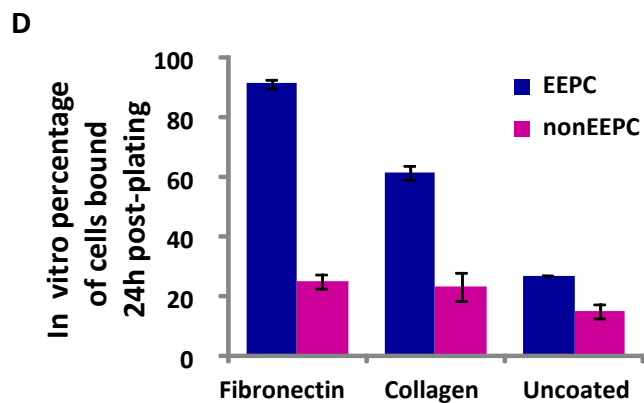

# Supplementary Figure S5

## A Serum Steroid Hormone Concentrations

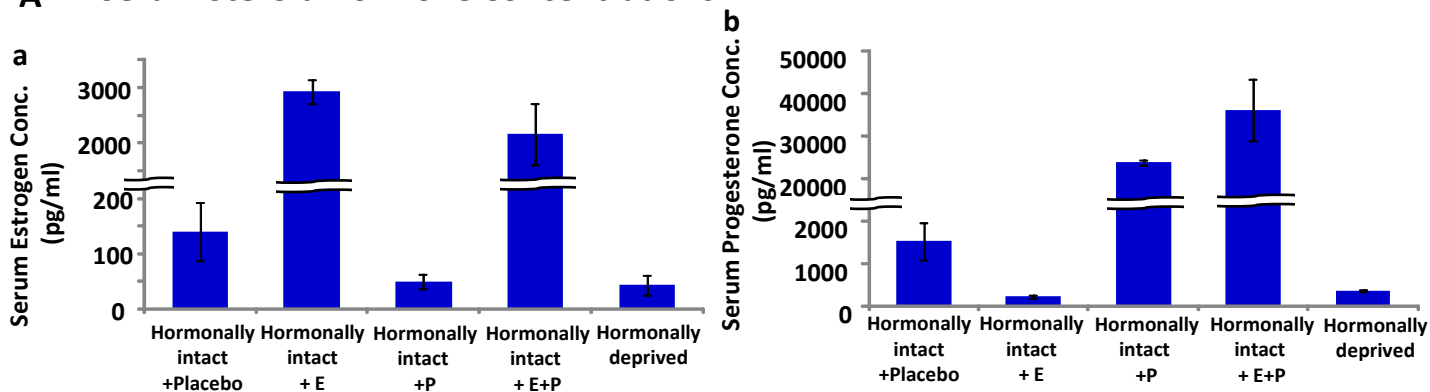

## B Profiles of uterine epithelia in in reproductive hormonally treated mice

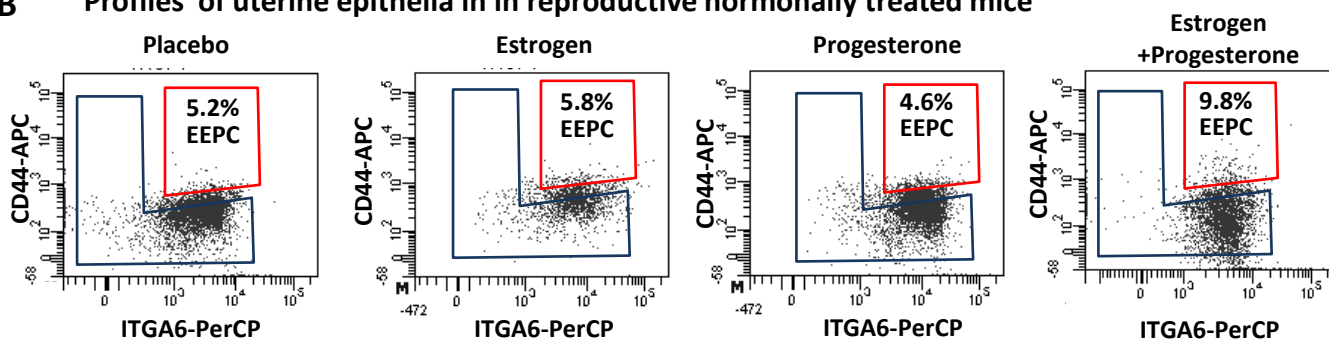

## C

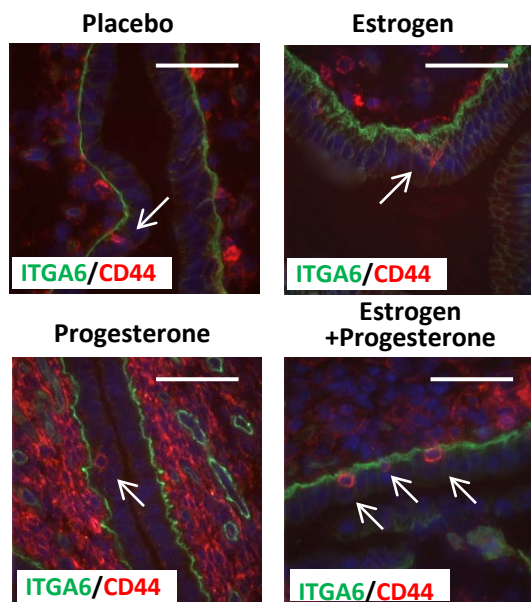

## D Estimation of progenitors based on in vivo serial dilution assay

| Cell Dose | Grafts with Regeneration |     |
|-----------|--------------------------|-----|
|           | Placebo                  | E+P |
| 10000     | 8/8                      | 6/6 |
| 1000      | 5/8                      | 7/7 |
| 100       | 0/7                      | 3/8 |

Placebo    1 in 1166

E + P    1 in 198

P = 0.006

# Supplementary Figure S6

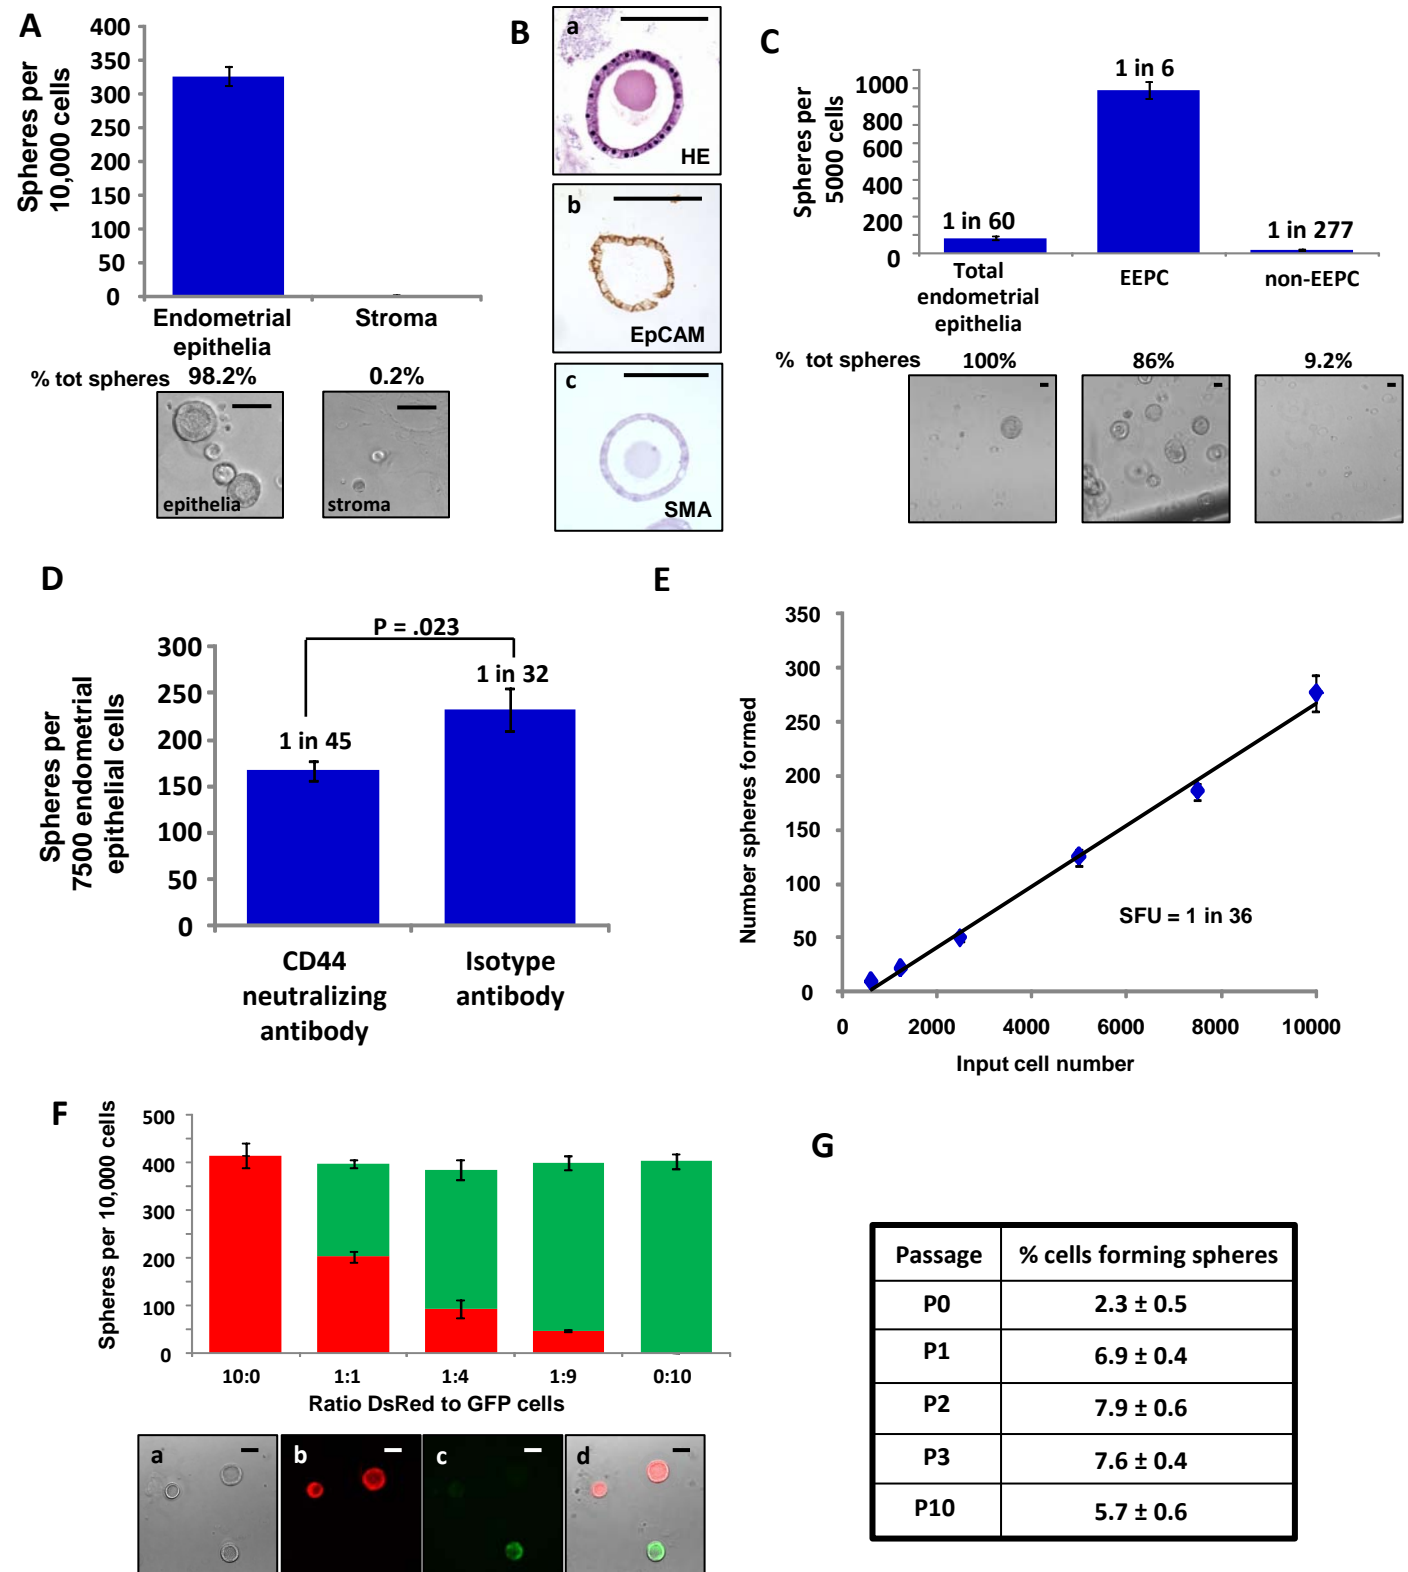

Supplementary Figure S7

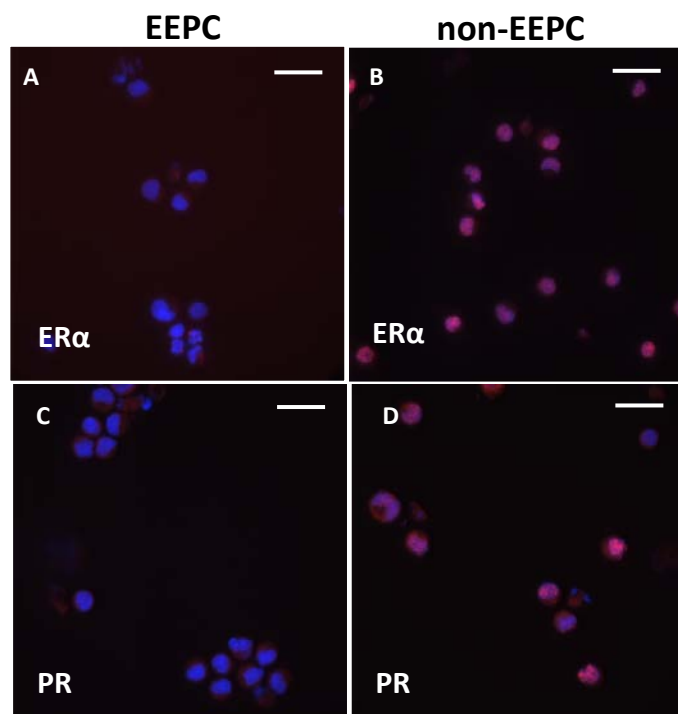

# Supplementary Figure S8

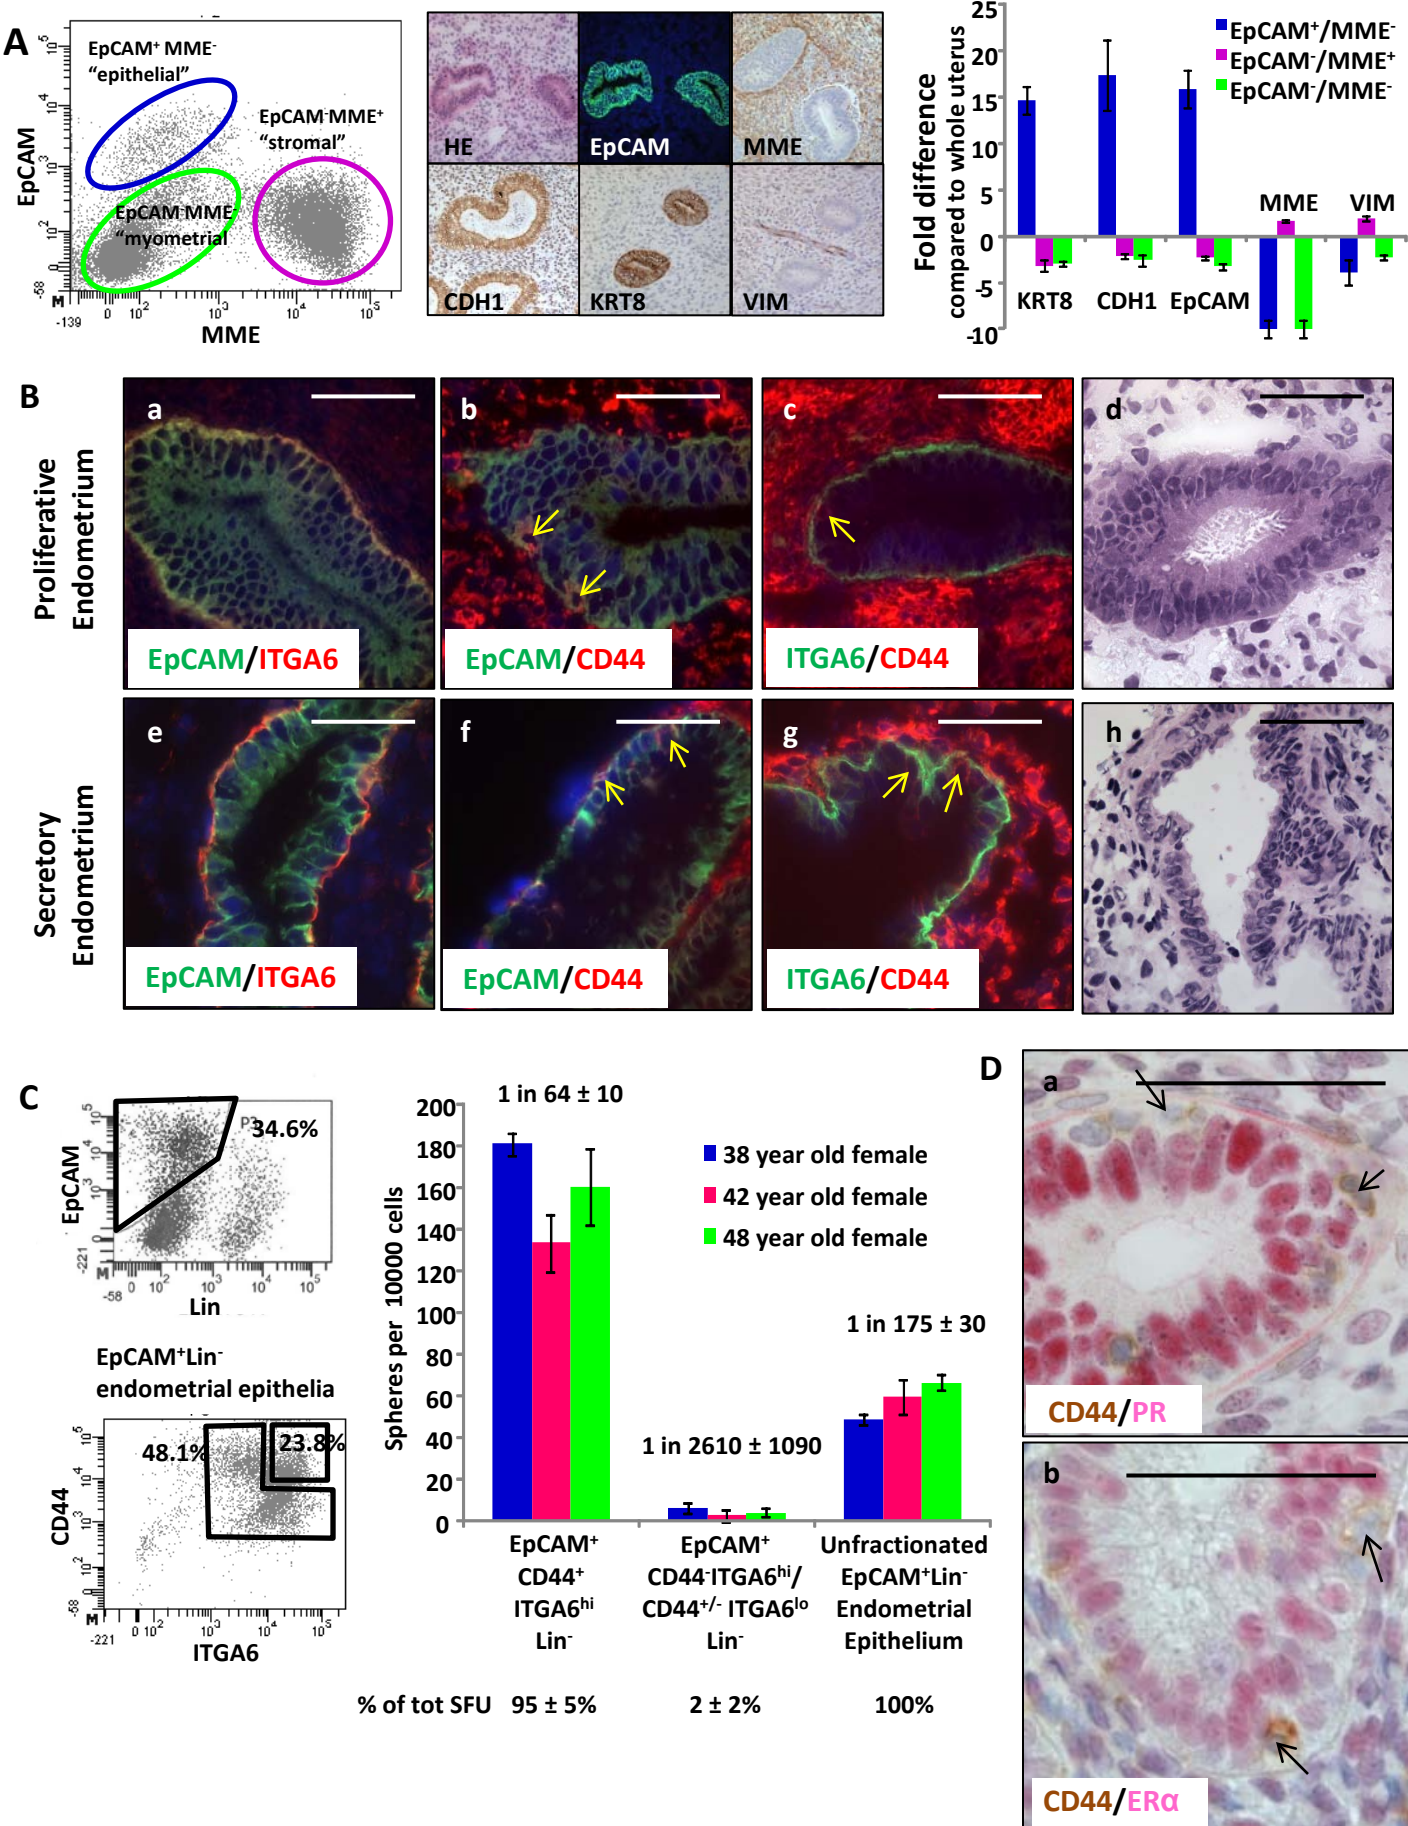



**Supplementary Table 1 Antibodies used for immunohistochemistry**

---

|                                                           |                 |                 |        |
|-----------------------------------------------------------|-----------------|-----------------|--------|
| Biotinylated anti-CD326 (EpCAM, clone G8.8)               | eBioscience     | 13-5791         | 1:100  |
| Biotinylated-CD90.2 (Thy1, clone 53-2.1)                  | BD Bioscience   | 553001          | 1:500  |
| Biotinylated CD29 (ITGB1, clone HMb1-1)                   | eBioscience     | 12-0291         | 1:250  |
| Anti-laminin                                              | Sigma           | L9393           | 1:400  |
| Anti- CD49f (ITGA6, clone GoH3)                           | BD Pharmingen   | 555734          | 1:250  |
| Biotinylated anti- CD49f (ITGA6, clone GoH3)              | BioLegend       | 313603          | 1:250  |
| Anti- CD44 (clone 1M7)/ -FITC                             | eBioscience     | 14-0441/11-0441 | 1:250  |
| Anti- smooth muscle actin (SMA, clone 1A4)                | Sigma           | A2547           | 1:400  |
| Anti-pankeratin (clone PCK-26)                            | Sigma           | C1801           | 1:750  |
| Anti-estrogen receptor $\alpha$ (ER $\alpha$ , clone 1D5) | Dako            | M7047           | 1:100  |
| Anti-progesterone receptor (PR, clone SP2)                | Labvision       | RM-9102-S0      | 1:250  |
| Anti- $\beta$ -catenin(CTNNB1 clone14/Beta-Catenin)       | BD Transduction | 610154          | 1:200  |
| Biotinylated anti-CD325 (EpCAM, clone 1B7)                | eBioscience     | 13-9326         | 1:100  |
| Anti-CD10 (MME, clone 56C6)                               | Vector          | VP-C328         | 1:100  |
| Anti-keratin 8 (KRT8, clone 1E8)                          | Covance         | MMS-162P        | 1:1000 |
| Anti-E-cadherin (CDH1, clone 34/Ecadherin)                | BD Transduction | 610404          | 1:200  |
| Anti-Vimentin (VIM, cloneLN-6)                            | Sigma           | V2258           | 1:200  |
| Alexa-594 anti-rat                                        | Invitrogen      | A21209          | 1:1000 |
| Alexa-594 anti-rabbit                                     | Invitrogen      | A11012          | 1:1000 |
| Biotinylated anti-rat                                     | Jackson IR      | 312-065-003     | 1:1000 |
| Biotinylated anti-mouse                                   | Vector          | BMK-2202        | 1:1000 |
| Biotinylated anti-rabbit                                  | Jackson IR      | 111-065-003     | 1:1000 |
| SA-fluorescein isothiocyanate (FITC)                      | Jackson IR      | 016-010-084     | 1:1000 |
| SA-Horseradish peroxidase                                 | Jackson IR      | 016-010-084     | 1:1000 |
| Alkaline-phosphatase anti-mouse                           | Vector          | AP-2000         | 1:250  |
| Alkaline-phosphatase anti-rabbit                          | Vector          | AP-1000         | 1:250  |
| Alkaline Phosphatase substrate Kit I                      | Vector          | SK-5100         |        |

---

## Supplementary Table 2 Antibodies used for FACS

|                                                               |             |                 |
|---------------------------------------------------------------|-------------|-----------------|
| Anti-mouse CD31-FITC/PE.Cy.7 (PECAM1, clone 390)              | eBioscience | 11-0311/25-0311 |
| Anti-mouse CD45- FITC/PE.Cy.7 (PTPRC, clone 30-F11)           | eBioscience | 11-0451/25-0451 |
| Anti-mouse Ter119- FITC/PE.Cy.7 (clone TER-119)               | eBioscience | 11-5921/25-5921 |
| Anti-mouse CD326-PE/PE.Cy7 (EpCAM, clone G8.8)                | eBioscience | 12-5791/25-5791 |
| Anti-mouse CD90.2-FITC/APC (Thy1, clone 53-2.1)               | eBioscience | 11-0902/17-0902 |
| Anti-human/mouse C49f-PE/PerCP eFluor 710 (ITGA6, clone GoH3) | eBioscience | 12-0495/46-0495 |
| Anti- human/mouse CD44-APC (clone IM7)                        | eBioscience | 17-0441         |
| Anti-human CD31-FITC (PECAM-1, clone WM59)                    | eBioscience | 11-0319         |
| Anti-human CD45-FITC (PTPRC, clone 2D1)                       | eBioscience | 11-9459         |
| Anti-human CD235a-FITC (GYPA, clone HIR2)                     | eBioscience | 11-9987         |
| Anti-human CD326-PE (EpCAM, clone 1B7)                        | eBioscience | 12-9326         |
| Anti-human CD10-FITC/PE.Cy7 (MME, CB-CALLA)                   | eBioscience | 11-0106/25-0106 |

### Supplementary Table 3 Primers used for QPCR

---

#### mouse primers

|            |                                   |
|------------|-----------------------------------|
| CDH1 F     | 5'-CCTGCCAATCCTTGATGAAAT-3'       |
| CDH1 R     | 5'-GAACCACTGCCCTCGTAATC-3'        |
| DES F      | 5' - TGCAGCCACTCTAGCTCGTA-3'      |
| DES R      | 5' - GACATGTCCATCTCCACCTG-3'      |
| SMA F      | 5'-ATAGGTGGTTTCGTGGATGC-3'        |
| SMA R      | 5'-TCCCTGGAGAAGAGCTACGA-3'        |
| EpCAM F    | 5'-GCGGCTCAGAGAGACTGTG-3'         |
| EpCAM R    | 5'-CCAAGCATTTAGACGCCAGTTT-3'      |
| CD44 F     | 5'-ATCAGCAGATCGATTTGAATGTAA-3'    |
| CD44 R     | 5'-CATTTCTTCTATGAACCCATAACC-3'    |
| cMyc F     | 5'-CTGGATTTCTTTGGGCGTT-3'         |
| cMyc R     | 5'-TGGTGAAGTTCACGTTGAGGG-3'       |
| cJun F     | 5'- CAT AGC CAG AAC ACG CTT CC-3' |
| cJun R     | 5'- AGT TGC TGA GGT TGG CGT AG-3' |
| Cyclin D1F | 5'- CCCTGACACCAATCTCCTCAAC-3'     |
| Cyclin D1R | 5'- GCATGGATGGCACAATCTCCA-3'      |
| Axin2 F    | 5'- GCA GGA GCC TCA CCC TTC-3'    |
| Axin2 R    | 5'- TGC CAG TTT CTT TGG CTC TT-3' |
| Id2 F      | 5'-CCTGAACACGGACATCAGC-3'         |
| Id2 R      | 5'-CACAGAGTACTTTGCTATCATTCG-3'    |
| TERT F     | 5'-TGGCTTGCTGCTGGACACTC-3'        |
| TERT R     | 5'-TGAGGCTCGTCTTAATTGAGGTCTG-3'   |
| GAPDH F    | 5'-TGTTCCCTACCCCCAATGTGT-3'       |
| GAPDH R    | 5'-TGTTCCCTACCCCCAATGTGT-3'       |

#### human primers

|         |                                  |
|---------|----------------------------------|
| EpCAM F | 5'-GGACCTGACAGTAAATGGGGGAAC-3'   |
| EpCAM R | 5'-CTCTTCTTTCTGGAAATAACCAGCAC-3' |
| KRT8 F  | 5'-TCCCAGATCTCGGACACATCT-3'      |
| KRT8 R  | 5'-GGAGCGGCTGTTGTCCAT-3'         |
| CDH1 F  | 5'-AGTGTCCCCCGGTATCTTCC-3'       |
| CDH1 R  | 5'-CAGCCGCTTTCAGATTTTCAT-3'      |
| MME F   | 5'-CACAGTCCAGGCAAT TTCAG-3'      |
| MME R   | 5'-AAACCCGGCACTTCTTTTCT-3'       |
| VIM F   | 5'-GACAATGCGTCTCTGGCACGTCTT-3'   |
| VIM R   | 5'-TCCTCCGCCTCCTGCAGGTTCTT-3'    |
| GAPDH F | 5'-AGCCACATCGCTCAGACAC-3'        |
| GAPDH R | 5'-GAGGCATTGCTGATGATCTTG-3'      |

---

**Supplementary Table 4 Antibodies used for western blot**

---

|                                                        |                 |           |
|--------------------------------------------------------|-----------------|-----------|
| Anti-ERK2 (C-14)                                       | Santa Cruz      | sc-154    |
| Anti-estrogen receptor $\alpha$ (ER $\alpha$ , MC-20)  | Santa Cruz      | sc-542    |
| Anti-progesterone receptor (PR, clone SP2)             | Labvision       | RM-9102-S |
| Anti- $\beta$ -catenin (CTNNB1, clone 14/Beta-Catenin) | BD Transduction | 610154    |
| HRP-anti-mouse                                         | Bio-Rad         | 170-6516  |
| HRP-anti-rabbit                                        | Bio-Rad         | 170-6515  |

---

Supplementary Table S5. Genes up- and down-regulated more than 2-fold in EEPC vs non-EEPC

| Gene_symbol | Gene_ID            | Cluster | RPKM 90.1  | RPKM90.2  | RPKM90.3  | UtESC-.1 | UtESC-.2  | UtESC-.3  | UtESC+.1  | UtESC+.2  | UtESC+.3  | Fold change expressed as ratio |                |                    |
|-------------|--------------------|---------|------------|-----------|-----------|----------|-----------|-----------|-----------|-----------|-----------|--------------------------------|----------------|--------------------|
|             |                    |         |            |           |           |          |           |           |           |           |           | non EEPC                       | EEPC to stroma | non EEPC to stroma |
| Arg1        | ENSMUSG00000019987 | A       | 1.46629058 | 2.2757654 | 1.0803103 | 394.5528 | 243.28884 | 473.4552  | 17.327118 | 34.390301 | 39.989673 | 0.08252259                     | 19.017032      | 230.446383         |
| Cuzd1       | ENSMUSG00000040205 | A       | 0.2045377  | 0.2719096 | 0.7567341 | 21.15999 | 9.6239413 | 15.73086  | 1.2315142 | 1.9394699 | 2.4696517 | 0.12126543                     | 4.574052       | 37.7193413         |
| Chi3l1      | ENSMUSG00000064246 | A       | 0.33477114 | 0.0142384 | 0.0249015 | 124.2445 | 5.3370428 | 3.7002373 | 4.3116585 | 2.1106823 | 5.2312878 | 0.08743603                     | 31.166851      | 356.453177         |
| Gpr110      | ENSMUSG00000041293 | A       | 0.03683304 | 0.0553521 | 0.0726041 | 5.018997 | 1.2649238 | 6.1204544 | 0.2514258 | 0.3796819 | 0.5515281 | 0.09534022                     | 7.1766568      | 75.274181          |
| AA467197    | ENSMUSG00000033213 | A       | 0.12478109 | 0.1250127 | 0.2295668 | 16.88403 | 3.1802444 | 7.0872379 | 0.9464082 | 1.00043   | 1.0308628 | 0.10966979                     | 6.2118185      | 56.641106          |
| Ceacam12    | ENSMUSG00000030366 | A       | 0.02380371 | 0.0178859 | 0.0093842 | 3.120919 | 0.3701747 | 3.0335927 | 0.1299891 | 0.1942537 | 0.2212326 | 0.08360178                     | 10.680132      | 127.75005          |
| Ltf         | ENSMUSG00000032496 | A       | 11.4771151 | 7.6029582 | 4.927648  | 3885.235 | 1956.1274 | 2368.8995 | 426.94899 | 667.7237  | 873.04585 | 0.23966576                     | 81.961904      | 341.98421          |
| Egln3       | ENSMUSG00000035105 | A       | 4.30497902 | 5.2576849 | 5.2018419 | 59.45931 | 9.2579376 | 38.607076 | 4.9007306 | 5.0089616 | 6.6615605 | 0.15440352                     | 1.122371       | 7.2690765          |
| Lcn2        | ENSMUSG00000026822 | A       | 9.3424755  | 8.3329916 | 5.8236564 | 2514.435 | 1376.6003 | 1986.3649 | 233.88291 | 516.97783 | 583.73162 | 0.22707187                     | 56.793283      | 250.111482         |
| Ccdc88b     | ENSMUSG00000047810 | A       | 0.07534241 | 0.0823443 | 0.0864073 | 24.04647 | 7.3850098 | 19.541161 | 1.9823707 | 3.2772014 | 3.9609279 | 0.18089116                     | 37.774388      | 208.823852         |
| Nlrc4       | ENSMUSG00000039193 | A       | 0.00924425 | 0.0069461 | 0.0437327 | 2.582818 | 1.2459077 | 2.7727793 | 0.2187539 | 0.4486639 | 0.4295821 | 0.16617423                     | 18.306826      | 110.166458         |
| Ctca2       | ENSMUSG00000028262 | A       | 0.02534848 | 0.0253955 | 0         | 19.72787 | 3.5696796 | 4.5333555 | 2.5531699 | 1.1794653 | 1.9108954 | 0.20277924                     | 111.21568      | 548.456946         |
| Trib2       | ENSMUSG00000020601 | A       | 1.97777412 | 2.9988008 | 3.1970685 | 11.47768 | 5.3465842 | 7.6066172 | 3.2001115 | 1.9912297 | 2.1448761 | 0.30028454                     | 0.8975456      | 2.98898358         |
| Pglyrp1     | ENSMUSG00000030413 | A       | 1.66716826 | 1.2918442 | 1.2323502 | 459.6278 | 135.03315 | 234.62378 | 29.683475 | 53.055711 | 71.017518 | 0.18540882                     | 36.68418       | 197.855641         |
| Galnt6      | ENSMUSG00000037280 | A       | 0.30695552 | 0.3002724 | 0.1232954 | 19.19908 | 11.36335  | 21.971579 | 5.7034519 | 3.276095  | 4.7069156 | 0.26052573                     | 18.735149      | 71.9128547         |
| C3          | ENSMUSG00000024164 | A       | 181.876988 | 166.86788 | 132.77459 | 3609.346 | 2355.6692 | 3579.4358 | 390.90773 | 792.18336 | 1068.0018 | 0.23585357                     | 4.6749781      | 19.8215281         |
| Abp1        | ENSMUSG00000029811 | A       | 0.77447352 | 0.4673796 | 0.43755   | 124.8192 | 63.649562 | 160.13978 | 20.946704 | 22.831846 | 31.424292 | 0.21572291                     | 44.779506      | 207.578815         |
| Zbp1        | ENSMUSG00000027514 | A       | 2.53424461 | 1.271375  | 2.0101329 | 8.770832 | 5.8604271 | 10.129185 | 1.3811569 | 2.2747235 | 2.4524971 | 0.24669903                     | 1.0503159      | 4.25747895         |
| Lrg1        | ENSMUSG00000037095 | A       | 5.40989006 | 5.0121224 | 1.3459162 | 159.5288 | 79.909839 | 100.88572 | 59.133265 | 23.574291 | 26.007699 | 0.31944604                     | 9.238266       | 28.919645          |
| Slc16a14    | ENSMUSG00000026220 | A       | 0.09984829 | 0.1333782 | 0.0787271 | 25.26132 | 11.04181  | 27.652569 | 6.684471  | 4.2218516 | 5.6367051 | 0.25866384                     | 53.030421      | 205.016752         |
| Slc27a2     | ENSMUSG00000027359 | A       | 0.0786296  | 0.0590817 | 0.1102166 | 15.41124 | 9.804883  | 21.837657 | 4.8186696 | 2.5966942 | 4.9801768 | 0.26343345                     | 49.996558      | 189.78819          |
| Irf7        | ENSMUSG00000025498 | A       | 4.73919102 | 3.7160983 | 3.295887  | 39.19838 | 24.811826 | 40.042351 | 6.1843015 | 11.078991 | 13.287593 | 0.29361015                     | 2.5998151      | 8.85464992         |
| Oasl1       | ENSMUSG00000041827 | A       | 0.30247694 | 0.3367094 | 0.3179907 | 20.41906 | 13.487304 | 13.299037 | 2.7223923 | 6.2552257 | 5.3853048 | 0.30426439                     | 15.005503      | 49.3173147         |
| Prss32      | ENSMUSG00000048992 | A       | 0.01484495 | 0.0557719 | 0.0819332 | 10.2671  | 4.3477849 | 11.372126 | 0.8647082 | 1.6705177 | 2.4068023 | 0.19017298                     | 32.396103      | 170.350714         |
| Mmp7        | ENSMUSG00000018623 | A       | 0.46335069 | 0.1492106 | 0.1565729 | 143.7654 | 54.728482 | 128.07448 | 14.338367 | 14.044616 | 34.246138 | 0.19177953                     | 81.428081      | 424.59214          |
| Il4i1       | ENSMUSG00000074141 | A       | 0.69279621 | 0.4412709 | 0.6113624 | 6.280736 | 5.3631018 | 8.8901911 | 1.1441687 | 1.8228101 | 2.070485  | 0.24532272                     | 2.8860885      | 11.7644565         |
| S100a9      | ENSMUSG00000056071 | A       | 0.20390474 | 0.2553541 | 0         | 26.77299 | 5.1087541 | 3.5413748 | 3.5879386 | 1.985117  | 1.965288  | 0.21280857                     | 16.414151      | 77.131061          |
| Pla2g2e     | ENSMUSG00000028751 | A       | 0.18905555 | 0.2604339 | 0.4968801 | 65.28737 | 20.498536 | 27.687699 | 2.1795293 | 5.4269233 | 8.4600636 | 0.14158814                     | 16.976999      | 119.904107         |
| Krt6b       | ENSMUSG00000023041 | A       | 0.20720239 | 0.0239524 | 0.0125671 | 28.70863 | 20.944515 | 13.130201 | 1.7988048 | 5.113793  | 7.4067216 | 0.22807511                     | 58.752715      | 257.602483         |
| Ada         | ENSMUSG00000017697 | A       | 2.85695741 | 2.5086387 | 2.5800313 | 17.97378 | 10.762825 | 18.501882 | 3.870136  | 5.8072544 | 4.9571866 | 0.30980196                     | 1.8418403      | 5.94521847         |
| Plac8       | ENSMUSG00000029322 | A       | 47.2486662 | 51.957422 | 42.964564 | 248.2092 | 114.00635 | 224.92836 | 18.127535 | 63.254316 | 54.514601 | 0.23145338                     | 0.9558685      | 4.12985344         |
| Chn2        | ENSMUSG00000004633 | A       | 0.14889447 | 0.1310573 | 0.0737932 | 4.469397 | 2.4808698 | 4.4270972 | 1.0066878 | 1.3886578 | 1.3135415 | 0.32598825                     | 10.484635      | 32.1626172         |
| Cfb         | ENSMUSG00000090231 | A       | 0.43850094 | 0.3118352 | 0.3395695 | 71.73067 | 31.092254 | 36.774134 | 3.4636159 | 11.249928 | 15.024164 | 0.21302532                     | 27.284665      | 128.081788         |
| Slc16a3     | ENSMUSG00000025161 | A       | 1.30564283 | 1.1882282 | 0.7800847 | 5.17465  | 1.3977551 | 2.5180898 | 0.9668982 | 0.7558391 | 1.0007567 | 0.299598                       | 0.8318665      | 2.77660895         |
| Slc5a1      | ENSMUSG00000011034 | A       | 0.05287545 | 0.0750459 | 0.0787488 | 14.86408 | 10.917963 | 9.4397673 | 1.9463631 | 4.7540481 | 4.5320453 | 0.31890631                     | 54.349673      | 170.425206         |
| Apol7a      | ENSMUSG00000010601 | A       | 0.2208492  | 0.0995666 | 0.0696529 | 2.358181 | 1.7458488 | 3.9807959 | 0.241206  | 0.6402812 | 0.638581  | 0.18801496                     | 3.8969236      | 20.7266677         |
| Ddx60       | ENSMUSG00000037921 | A       | 0.94781393 | 0.804671  | 0.5499756 | 2.682746 | 1.1272699 | 2.6694217 | 0.4033163 | 0.6643908 | 0.7881088 | 0.28641618                     | 0.8060142      | 2.81413631         |
| Nt5e        | ENSMUSG00000032420 | A       | 0.29731361 | 1.1244424 | 4.5243431 | 25.11351 | 15.668749 | 16.370263 | 7.630884  | 6.206149  | 10.367286 | 0.42350399                     | 4.0706215      | 9.6117666          |
| Tmem178     | ENSMUSG00000024245 | A       | 0.50206733 | 1.1946235 | 0.6597724 | 3.904548 | 1.4639472 | 3.5055954 | 0.6092726 | 0.9524183 | 0.8641175 | 0.27335855                     | 1.0294277      | 3.76585133         |
| Rasal1      | ENSMUSG00000029602 | A       | 0.03994531 | 0.072035  | 0.0314956 | 4.395635 | 0.9939121 | 1.4287743 | 1.0325119 | 0.5387243 | 0.5115046 | 0.30546244                     | 14.516312      | 47.5224128         |
| Krtap4-16   | ENSMUSG00000046474 | A       | 0.0961502  | 0         | 0.0189528 | 5.876523 | 1.6821508 | 4.0281096 | 1.3564158 | 1.1872965 | 0.8439782 | 0.2923754                      | 29.431814      | 100.66447          |
| Ifi44       | ENSMUSG00000028037 | A       | 0.72677649 | 0.5660247 | 0.2509661 | 10.23558 | 4.5648796 | 10.802212 | 0.9656533 | 2.6886449 | 2.6679112 | 0.2469355                      | 4.0953125      | 16.5845435         |

|               |                    |   |            |           |           |          |           |           |           |           |           |            |           |            |
|---------------|--------------------|---|------------|-----------|-----------|----------|-----------|-----------|-----------|-----------|-----------|------------|-----------|------------|
| Naip1         | ENSMUSG00000021640 | A | 0.01988385 | 0.0647425 | 0.0418074 | 5.912201 | 5.2566818 | 10.770832 | 1.1582212 | 1.8959404 | 2.2586834 | 0.24215653 | 42.020796 | 173.527415 |
| Hgfac         | ENSMUSG00000029102 | A | 0.7254471  | 0.7352449 | 0.6518037 | 102.3872 | 71.799495 | 120.64077 | 42.594615 | 31.267217 | 39.704865 | 0.38519718 | 53.759493 | 139.563569 |
| Sftpd         | ENSMUSG00000021795 | A | 0.91837919 | 1.225214  | 0.7093337 | 279.6208 | 224.23463 | 284.83411 | 69.905099 | 91.907105 | 123.23183 | 0.36141477 | 99.912842 | 276.449253 |
| Cp            | ENSMUSG00000003617 | A | 3.5564101  | 3.1045363 | 5.2724364 | 48.28063 | 11.890064 | 21.449403 | 11.233779 | 7.3390894 | 10.842922 | 0.36039884 | 2.4650001 | 6.83964498 |
| Rnf186        | ENSMUSG00000070661 | A | 0          | 0.0637774 | 0.1338486 | 5.539971 | 1.9066164 | 4.3029559 | 2.111562  | 0.8506447 | 1.6946075 | 0.39634    | 23.563774 | 59.4534327 |
| C2            | ENSMUSG00000024371 | A | 3.1030671  | 4.2938757 | 2.4321308 | 8.64737  | 2.7870758 | 3.4092599 | 0.9954759 | 1.6415772 | 1.9417053 | 0.30846463 | 0.4658382 | 1.51018362 |
| Dio3os        | ENSMUSG00000090962 | A | 5.51163583 | 2.2684054 | 2.2711416 | 15.20717 | 12.993225 | 15.210943 | 1.411648  | 4.9249169 | 4.2616306 | 0.24413427 | 1.0544227 | 4.31902795 |
| Pla2g15       | ENSMUSG00000031903 | A | 9.07979357 | 6.487278  | 7.6970844 | 16.5045  | 16.527878 | 19.253146 | 4.729073  | 5.8328574 | 6.5038905 | 0.32639668 | 0.7335672 | 2.24747127 |
| Muc20         | ENSMUSG00000035638 | A | 0.30836351 | 0.4567839 | 0.3959617 | 87.95673 | 61.472508 | 95.011113 | 20.367588 | 35.10916  | 35.401223 | 0.37177974 | 78.268243 | 210.523154 |
| Trim30a       | ENSMUSG00000030921 | A | 0.71448784 | 0.6319617 | 0.3283526 | 3.906031 | 2.6031718 | 3.691101  | 1.1890982 | 1.4081323 | 1.3027989 | 0.38234445 | 2.3286509 | 6.09045302 |
| Casc1         | ENSMUSG00000043541 | A | 0.46048697 | 1.0512003 | 1.2725044 | 1.900756 | 1.6481889 | 2.8038063 | 0.3911696 | 0.7063671 | 0.7382063 | 0.28896819 | 0.659345  | 2.28172187 |
| Cited1        | ENSMUSG00000051159 | A | 0.57128896 | 0.6707221 | 0.8821164 | 5.42413  | 2.3135921 | 3.4693574 | 0.6499453 | 1.6562685 | 1.7944425 | 0.36589875 | 1.9305133 | 5.27608616 |
| Ankrd22       | ENSMUSG00000024774 | A | 0          | 0.0916116 | 0.0320439 | 4.265856 | 2.9493838 | 6.371646  | 1.0850124 | 1.5186326 | 1.0212358 | 0.26679262 | 29.314352 | 109.876923 |
| Fam84a        | ENSMUSG00000020607 | A | 8.45248204 | 7.439895  | 5.1577448 | 41.8889  | 44.767745 | 58.227507 | 9.1169106 | 17.038112 | 17.966893 | 0.30453239 | 2.0960409 | 6.8828175  |
| Csf2          | ENSMUSG00000018916 | A | 0.04434928 | 0.0333237 | 0         | 4.189603 | 2.8736742 | 3.7471574 | 0.645829  | 0.8190797 | 1.3281486 | 0.25836678 | 35.959184 | 139.178822 |
| 2010012P19Rik | ENSMUSG00000085890 | A | 0.43019085 | 0.5103822 | 0.4105999 | 3.279673 | 1.2323606 | 2.5188295 | 0.6182153 | 0.8071547 | 0.9586355 | 0.33907726 | 1.764397  | 5.2035251  |
| Tnfrsf23      | ENSMUSG00000037613 | A | 4.19142617 | 1.9916239 | 2.5116484 | 17.97748 | 16.885099 | 14.491707 | 3.2698361 | 6.6626415 | 7.3128765 | 0.34941957 | 1.9834332 | 5.67636563 |
| Apobec2       | ENSMUSG00000040694 | A | 0.17477549 | 0.5252998 | 0.206707  | 55.13591 | 54.359157 | 60.381124 | 6.4158705 | 20.743639 | 16.815245 | 0.25886355 | 48.49538  | 187.339543 |
| Atg9b         | ENSMUSG00000038295 | A | 0.07298791 | 0.1535592 | 0.1438714 | 10.61419 | 10.385663 | 17.647588 | 2.3648952 | 3.5769076 | 5.170555  | 0.28753149 | 29.999472 | 104.334562 |
| Sprr2a3       | ENSMUSG00000074445 | A | 0.04914048 | 0.1846189 | 0.0387456 | 24.08327 | 15.029077 | 29.479022 | 1.4311999 | 6.7117786 | 7.2566722 | 0.22451294 | 56.511444 | 251.70685  |
| Isg15         | ENSMUSG00000035692 | A | 7.74352521 | 7.1936893 | 6.8825781 | 38.7456  | 29.192881 | 32.977629 | 7.0904501 | 14.633982 | 14.92683  | 0.36318544 | 1.6797255 | 4.62498038 |
| D14Ertd668e   | ENSMUSG00000068245 | A | 0.50984324 | 0.3788357 | 0.3349954 | 1.618442 | 0.983739  | 1.675242  | 0.3815371 | 0.6107156 | 0.4387504 | 0.33454797 | 1.1694313 | 3.49555654 |
| Uox           | ENSMUSG00000028186 | A | 0.12091823 | 0.2044283 | 0.04767   | 32.27848 | 28.989749 | 28.762617 | 3.6500983 | 12.810715 | 8.4286431 | 0.27645478 | 66.724805 | 241.358841 |
| Irx3          | ENSMUSG00000031734 | A | 0.33285601 | 0.4206319 | 0.4413863 | 3.118449 | 2.3136447 | 5.518202  | 0.6609763 | 0.9357662 | 1.2811786 | 0.26281675 | 2.4085557 | 9.16439182 |
| Dio3          | ENSMUSG00000075707 | A | 24.2937932 | 33.067624 | 28.911421 | 46.79047 | 41.26766  | 67.091961 | 7.2854596 | 14.480511 | 20.828042 | 0.27453424 | 0.4937129 | 1.79836546 |
| Xdh           | ENSMUSG00000024066 | A | 19.6225718 | 15.409019 | 22.691896 | 26.1838  | 20.911921 | 29.016777 | 7.8595126 | 10.178615 | 10.690158 | 0.37744503 | 0.497688  | 1.31857077 |
| Ifit1         | ENSMUSG00000034459 | A | 2.55141946 | 3.3524453 | 3.4230661 | 39.25746 | 28.321271 | 30.64317  | 4.7902223 | 16.747644 | 10.690852 | 0.32812152 | 3.4554473 | 10.5309987 |
| Ilgam         | ENSMUSG00000030786 | A | 0.21296173 | 0.3636768 | 0.8853608 | 37.66471 | 22.460008 | 47.383023 | 1.9523586 | 9.63249   | 10.21226  | 0.2027492  | 14.909109 | 73.5347378 |
| Fam184b       | ENSMUSG00000015879 | A | 0.15493199 | 0.0840773 | 0.2646773 | 1.793793 | 1.0708306 | 3.0059681 | 0.7363892 | 0.4732054 | 0.6221982 | 0.31202863 | 3.6367713 | 11.6552489 |
| Hist1h2ac     | ENSMUSG00000069270 | A | 0.24300976 | 0.2040775 | 0.3944812 | 5.074215 | 4.9276218 | 4.2473823 | 0.9887792 | 1.8296254 | 1.7123592 | 0.31796576 | 5.3837142 | 16.9317419 |
| Clca4         | ENSMUSG00000037033 | A | 0.17981037 | 0.1137753 | 0.0895418 | 54.58401 | 56.023233 | 24.734504 | 2.9974457 | 12.897405 | 11.463606 | 0.20214351 | 71.408242 | 353.255186 |
| Dhx58         | ENSMUSG00000017830 | A | 1.35206905 | 1.2499715 | 1.5683943 | 6.500882 | 4.0180983 | 6.5692384 | 1.5205071 | 2.5205259 | 2.8728977 | 0.40460219 | 1.6578441 | 4.04746684 |
| Cxcl17        | ENSMUSG00000060188 | A | 2.14461699 | 2.0318266 | 1.2498395 | 397.1089 | 464.50055 | 518.33215 | 134.25774 | 151.18545 | 182.75961 | 0.33929174 | 86.284255 | 254.306974 |
| Sifn5         | ENSMUSG00000054404 | A | 5.67370862 | 3.3945813 | 2.5914949 | 5.20531  | 4.2593945 | 4.9803712 | 0.7506994 | 2.2678223 | 1.4905799 | 0.31215494 | 0.3867225 | 1.2388801  |
| Cd200r3       | ENSMUSG00000036172 | A | 0.02937733 | 0.0504546 | 0.0463261 | 1.826124 | 0.9898438 | 2.2280236 | 0.3972452 | 0.6903737 | 0.5417344 | 0.32302855 | 12.915173 | 39.981521  |
| Muc4          | ENSMUSG00000079620 | A | 0.48060518 | 0.5772391 | 0.3467532 | 159.0052 | 100.00867 | 130.06085 | 21.350862 | 66.028488 | 67.424957 | 0.39787809 | 110.21258 | 277.00087  |
| Serpina1e     | ENSMUSG00000072849 | A | 0.64472523 | 0.7633625 | 0.7394101 | 154.1389 | 111.40235 | 268.46374 | 25.107667 | 51.162063 | 64.621906 | 0.26383954 | 65.607348 | 248.663824 |
| Ube2l6        | ENSMUSG00000027078 | A | 6.96627971 | 5.0692033 | 4.0054597 | 10.52101 | 5.5786395 | 7.7403773 | 2.0853577 | 4.3240908 | 4.5648854 | 0.46033234 | 0.6841452 | 1.48619843 |
| Uba7          | ENSMUSG00000032596 | A | 4.26384776 | 3.7654801 | 2.6397161 | 18.42657 | 10.450965 | 17.28659  | 6.9565552 | 6.7782788 | 8.1539873 | 0.47415221 | 2.0516198 | 4.32692231 |
| Ero1l         | ENSMUSG00000021831 | A | 8.04508975 | 9.8285911 | 11.480501 | 56.6981  | 21.601779 | 32.98593  | 11.333237 | 16.357356 | 19.518947 | 0.42421888 | 1.6082731 | 3.79113983 |
| Apol9a        | ENSMUSG00000068246 | A | 0.18371223 | 0.086275  | 0.1086383 | 2.708431 | 2.678376  | 2.231317  | 0.2926086 | 0.8383747 | 0.8537146 | 0.26052319 | 5.2418499 | 20.1204737 |
| Tmprss11d     | ENSMUSG00000061259 | A | 0.06257394 | 0.0658246 | 0.1381449 | 17.76243 | 18.942936 | 20.072956 | 1.6629811 | 6.9877601 | 5.5571748 | 0.25023486 | 53.304308 | 213.017113 |
| Smpdl3a       | ENSMUSG00000019872 | A | 5.54828366 | 9.460709  | 9.227569  | 108.3852 | 55.182214 | 80.00603  | 46.646195 | 39.431228 | 46.248954 | 0.5432709  | 5.4597834 | 10.0498358 |
| Spnb5         | ENSMUSG00000074899 | A | 0.13444399 | 0.2253527 | 0.3506307 | 1.961849 | 1.6797536 | 2.8786946 | 0.6839813 | 0.6351923 | 1.1071317 | 0.37211575 | 3.4152755 | 9.17799228 |
| Steap2        | ENSMUSG00000015653 | A | 0.80075301 | 0.5406    | 0.4610894 | 4.494292 | 1.8018565 | 3.1863801 | 1.309635  | 1.4424204 | 1.6074719 | 0.45974311 | 2.4186777 | 5.26093309 |
| Rsad2         | ENSMUSG00000020641 | A | 0.78760802 | 1.6570473 | 1.1725994 | 20.8517  | 19.66917  | 14.261837 | 2.6396509 | 8.9744714 | 7.1430405 | 0.34239206 | 5.1854692 | 15.1448291 |

|                 |                    |   |            |           |           |          |           |           |           |           |           |            |           |            |
|-----------------|--------------------|---|------------|-----------|-----------|----------|-----------|-----------|-----------|-----------|-----------|------------|-----------|------------|
| Il1a            | ENSMUSG00000027399 | A | 0.62906781 | 1.1344241 | 0.5951989 | 170.2957 | 140.26558 | 184.13084 | 15.016995 | 74.66496  | 63.755589 | 0.31016779 | 65.051995 | 209.731629 |
| Hsd17b2         | ENSMUSG00000031844 | A | 0.0277183  | 0.0833093 | 0.0655649 | 24.42348 | 28.233849 | 31.889871 | 1.6650278 | 8.0241239 | 9.0165263 | 0.22124538 | 105.92569 | 478.770201 |
| Gm10238         | ENSMUSG00000068348 | A | 0          | 0.074675  | 0         | 5.120982 | 3.3485951 | 7.5572922 | 0.7236179 | 1.6647311 | 0.8210327 | 0.20025006 | 42.978007 | 214.621691 |
| Gm14023         | ENSMUSG00000085498 | A | 0.01992107 | 0.0299371 | 0.0471213 | 4.037554 | 3.3044833 | 4.6006649 | 1.0878646 | 1.4716761 | 1.5840376 | 0.34695484 | 42.726352 | 123.146723 |
| Fxyd4           | ENSMUSG00000004988 | A | 0.97649792 | 1.267357  | 1.9131749 | 44.79414 | 32.365385 | 37.711175 | 9.8571058 | 19.267604 | 21.084756 | 0.43709549 | 12.078207 | 27.6328792 |
| Cd79b           | ENSMUSG00000040592 | A | 5.16258562 | 4.7485865 | 15.608368 | 32.57455 | 14.90331  | 49.360448 | 11.179678 | 9.7640793 | 15.644473 | 0.37782806 | 1.4337339 | 3.79467297 |
| Trim30d         | ENSMUSG00000057596 | A | 0.66637907 | 0.5586893 | 0.2544128 | 2.060239 | 1.6907976 | 1.9558117 | 1.0087087 | 0.7290952 | 0.6519321 | 0.41874886 | 1.6152527 | 3.85733046 |
| Mx2             | ENSMUSG00000023341 | A | 1.27708314 | 1.9963893 | 1.3657316 | 4.16854  | 3.27197   | 4.0928819 | 1.0420906 | 1.7464285 | 1.5310289 | 0.37452538 | 0.9310968 | 2.48607131 |
| Krt20           | ENSMUSG00000035775 | A | 0.03682348 | 0.0830066 | 0.2322728 | 15.05308 | 4.7720589 | 12.393297 | 5.5969608 | 4.2940373 | 4.4871331 | 0.44627027 | 40.835029 | 91.5029128 |
| Dnahc10         | ENSMUSG00000038011 | A | 0.12426692 | 0.4320799 | 0.1901971 | 2.029788 | 2.0335375 | 2.3229408 | 0.1286247 | 0.7273464 | 0.7624127 | 0.25341625 | 2.1678344 | 8.5544409  |
| ORF63           | ENSMUSG00000025610 | A | 0.83758932 | 0.580946  | 0.6434778 | 1.979679 | 1.3916098 | 1.7541173 | 0.3127501 | 0.7379512 | 0.2883181 | 0.26125138 | 0.6493749 | 2.4856322  |
| Hist2h3c1       | ENSMUSG00000070392 | A | 1.14515138 | 1.0279807 | 1.4063084 | 2.57034  | 1.7598279 | 2.0549963 | 0.8854553 | 0.8618284 | 1.1197739 | 0.4490186  | 0.8009793 | 1.78384426 |
| Pdk1            | ENSMUSG00000006494 | A | 1.44389226 | 1.0751554 | 1.6974353 | 3.641858 | 1.3654562 | 4.2222782 | 1.6930072 | 0.9958925 | 1.4709165 | 0.4507042  | 0.9865607 | 2.18893161 |
| Adam28          | ENSMUSG00000014725 | A | 0.03856459 | 0.0434657 | 0.0304069 | 9.637744 | 2.6237895 | 4.9147499 | 2.1761628 | 2.3644819 | 2.7578499 | 0.42491698 | 64.911742 | 152.76335  |
| Tnfaip2         | ENSMUSG00000021281 | A | 1.75876127 | 3.0817944 | 1.8388579 | 6.75039  | 3.5887651 | 3.436833  | 0.9865328 | 2.9810588 | 2.1953541 | 0.44736869 | 0.9226777 | 2.06245475 |
| Spock1          | ENSMUSG00000056222 | A | 0.16870514 | 0.0606261 | 0.0751843 | 2.376946 | 2.0342072 | 0.8676486 | 0.6408888 | 0.7813098 | 0.5605241 | 0.3756009  | 6.5110712 | 17.3350786 |
| Fcgbp           | ENSMUSG00000047730 | A | 1.55087232 | 1.2446787 | 0.6357807 | 227.8571 | 103.01492 | 187.03137 | 128.39672 | 74.061239 | 92.027437 | 0.56861064 | 85.822481 | 150.933652 |
| Ifit2           | ENSMUSG00000045932 | A | 3.50154696 | 2.3350439 | 3.5615012 | 3.919305 | 3.1991162 | 1.7011521 | 0.5577107 | 1.6430566 | 1.1209436 | 0.37662941 | 0.3534452 | 0.938443   |
| Prap1           | ENSMUSG00000025467 | A | 5.60803808 | 2.6228983 | 4.3766321 | 2158.543 | 2567.8411 | 3740.3078 | 168.22803 | 463.42829 | 912.53709 | 0.18238451 | 122.48146 | 671.55626  |
| Flt1            | ENSMUSG00000029648 | A | 0.14429713 | 0.2721657 | 0.2484442 | 5.670102 | 6.4266499 | 3.8193138 | 0.8951978 | 2.720653  | 1.9979705 | 0.35271414 | 8.4430168 | 23.9372794 |
| Lrrc36          | ENSMUSG00000054320 | A | 0.21712026 | 0.3559473 | 0.3812916 | 3.424149 | 1.8161301 | 1.9595705 | 1.3832776 | 1.2843738 | 1.2026016 | 0.53754634 | 4.0553426 | 7.54417298 |
| Ces1d           | ENSMUSG00000056973 | A | 2.11425344 | 2.8764611 | 2.0813074 | 70.25827 | 19.098382 | 46.015868 | 14.93878  | 14.459563 | 30.579523 | 0.4430579  | 8.4810067 | 19.1419829 |
| Brf2            | ENSMUSG00000031487 | A | 5.38733128 | 3.816685  | 3.4790948 | 17.77224 | 5.651767  | 20.989139 | 5.9773034 | 5.7737344 | 6.7554871 | 0.41669026 | 1.4591471 | 3.50175482 |
| Unc93b1         | ENSMUSG00000036908 | A | 7.32717191 | 4.9077523 | 5.3833299 | 25.11743 | 7.2894661 | 16.27188  | 10.542084 | 6.6358842 | 8.8849758 | 0.53540676 | 1.4793148 | 2.76297372 |
| Ctca3           | ENSMUSG00000028255 | A | 6.50355381 | 8.3019745 | 3.1262646 | 1906.855 | 2342.0827 | 2771.3048 | 126.83332 | 583.33818 | 993.22392 | 0.24264054 | 94.993035 | 391.496967 |
| Dbil5           | ENSMUSG00000038057 | A | 0.54959522 | 0.9176925 | 1.0111211 | 2.202639 | 3.4820424 | 4.0416844 | 0.5557908 | 0.7606232 | 1.0089799 | 0.23908147 | 0.9382609 | 3.92443985 |
| Chi3l4          | ENSMUSG00000063779 | A | 0          | 0.0280621 | 0         | 4.982087 | 6.9210174 | 5.469535  | 0.169955  | 1.1148306 | 1.8319291 | 0.17940365 | 111.06504 | 619.079039 |
| Pcdh17          | ENSMUSG00000035566 | A | 1.92526902 | 2.5540349 | 3.8656321 | 31.06478 | 24.37954  | 43.33131  | 2.777832  | 11.206665 | 15.624088 | 0.29975598 | 3.5480901 | 11.836595  |
| Ccl5            | ENSMUSG00000035042 | A | 0.1108732  | 0.111079  | 0.0874198 | 6.03049  | 3.1610416 | 2.7062803 | 0.6054646 | 2.4286666 | 1.2976165 | 0.36407936 | 14.001741 | 38.4579376 |
| Expi            | ENSMUSG00000000983 | A | 0          | 0         | 0.0229298 | 9.124303 | 1.4321262 | 4.5047794 | 3.3350184 | 0.8618605 | 1.1712334 | 0.35641976 | 234.11078 | 656.840083 |
| Scn4a           | ENSMUSG00000001027 | A | 5.23549526 | 3.9036208 | 15.069835 | 45.67231 | 28.184128 | 67.900486 | 11.979159 | 15.602291 | 26.913045 | 0.38442211 | 2.2510061 | 5.85555824 |
| Parm1           | ENSMUSG00000034981 | A | 11.873146  | 5.0288026 | 6.3974489 | 38.51016 | 17.074206 | 23.581164 | 15.304668 | 14.264474 | 17.574664 | 0.59550924 | 2.0233916 | 3.3977502  |
| Noxa1           | ENSMUSG00000036805 | A | 0.04266918 | 0.1282452 | 0.0841081 | 15.35402 | 9.8980191 | 11.716908 | 4.0776933 | 6.4418525 | 9.0770272 | 0.53008204 | 76.842542 | 144.963489 |
| 2010109I03Rik   | ENSMUSG00000063522 | A | 0.07520811 | 0.0565108 | 0.0741239 | 15.13535 | 15.009503 | 15.277229 | 0.8556292 | 6.4847217 | 6.756877  | 0.31036069 | 68.485416 | 220.66395  |
| Dmbt1           | ENSMUSG00000047517 | A | 0.06220492 | 0.0509894 | 0.098093  | 6.708481 | 0.9527004 | 1.5369278 | 1.9763972 | 0.3594719 | 0.9693983 | 0.35934204 | 15.643469 | 43.5336446 |
| Pigr            | ENSMUSG00000026417 | A | 3.83668248 | 2.9363499 | 1.6279387 | 741.956  | 212.86589 | 499.48731 | 402.37232 | 124.65828 | 156.38997 | 0.46992798 | 81.350187 | 173.112031 |
| Tnf             | ENSMUSG00000024401 | A | 0.36848067 | 0.5141937 | 0.5706933 | 8.318177 | 3.1380181 | 3.9287704 | 1.9643165 | 3.1200883 | 2.4190162 | 0.48771128 | 5.1627823 | 10.5857348 |
| Ucp1            | ENSMUSG00000031710 | A | 0.77692171 | 0.3243183 | 1.7016028 | 2.248788 | 1.2305758 | 2.7959325 | 0.314272  | 0.7600808 | 1.2034571 | 0.36298044 | 0.8126784 | 2.23890417 |
| Defb1           | ENSMUSG00000044748 | A | 0.04068741 | 0         | 0.0320807 | 8.805505 | 2.0036627 | 1.1459197 | 2.8143922 | 0.6990226 | 0.9243679 | 0.37120453 | 60.985285 | 164.290249 |
| Gm11642         | ENSMUSG00000086794 | A | 0.08063506 | 0.1211771 | 0.1907342 | 1.246494 | 1.4629614 | 2.3845547 | 0.5871172 | 0.3117005 | 0.333078  | 0.24183224 | 3.1382172 | 12.9768354 |
| Ifit3           | ENSMUSG00000074896 | A | 1.05726652 | 0.7333125 | 1.1061491 | 4.295462 | 6.6399166 | 3.6934732 | 0.5181436 | 2.0347366 | 1.5747242 | 0.28215504 | 1.4249195 | 5.0501294  |
| misc_RNA        | ENSMUSG00000092837 | A | 2.3356361  | 2.5906832 | 4.2093065 | 28.90974 | 14.701681 | 86.611413 | 8.7055313 | 2.1018886 | 6.8912695 | 0.1359108  | 1.9373264 | 14.2543961 |
| misc_RNA        | ENSMUSG00000065037 | A | 13.1841971 | 10.953533 | 16.226813 | 1368.473 | 807.05968 | 1117.5812 | 107.89831 | 185.2583  | 451.61758 | 0.22616105 | 18.451198 | 81.5843316 |
| processed_trans | ENSMUSG00000092600 | A | 0          | 0.0541849 | 0.1705753 | 14.36789 | 8.4107538 | 18.177268 | 5.513174  | 4.3981591 | 5.7340872 | 0.38200637 | 69.609391 | 182.2205   |
| processed_trans | ENSMUSG00000092171 | A | 0.02405385 | 0.0361478 | 0.056897  | 1.928035 | 0.8104735 | 2.8452992 | 0.6129902 | 0.5888851 | 0.7700312 | 0.35314726 | 16.839713 | 47.6846773 |
| Il2rb           | ENSMUSG00000068227 | B | 0.17525512 | 0.3877402 | 0.2226279 | 0.133786 | 0.151412  | 0.0959755 | 0.6380308 | 4.2738594 | 1.276921  | 16.2361888 | 7.8775818 | 0.48518663 |

|               |                    |   |            |           |           |          |           |           |           |           |           |            |           |            |
|---------------|--------------------|---|------------|-----------|-----------|----------|-----------|-----------|-----------|-----------|-----------|------------|-----------|------------|
| Rgs1          | ENSMUSG00000026358 | B | 0.10454046 | 0.2114832 | 0.0951077 | 0.069061 | 0.0416852 | 0.0679448 | 0.2927602 | 1.8133077 | 0.4318237 | 14.202656  | 6.1729457 | 0.43463319 |
| Ptprc         | ENSMUSG00000026395 | B | 0.03281226 | 0.056354  | 0.0480468 | 0.080512 | 0.0364477 | 0.0396053 | 0.2303789 | 1.2401948 | 0.3146397 | 11.4023625 | 13.010517 | 1.14103697 |
| Plek          | ENSMUSG00000020120 | B | 0.32087973 | 0.4859224 | 0.3425272 | 0.118708 | 0.0511799 | 0.1598898 | 0.6739554 | 2.0312602 | 0.4588107 | 9.59441406 | 2.7529327 | 0.28693078 |
| H2-Eb1        | ENSMUSG00000060586 | B | 2.62589518 | 1.8385494 | 1.646934  | 1.400912 | 0.8507429 | 0.630304  | 4.2367248 | 10.740138 | 3.4512374 | 6.3942959  | 3.0153754 | 0.4715727  |
| Gstm7         | ENSMUSG0000004035  | B | 1.07513408 | 2.4725028 | 1.4128459 | 13.79397 | 9.2042017 | 13.993058 | 26.094099 | 39.111244 | 88.635764 | 4.15885363 | 31.013333 | 7.45718313 |
| Wif1          | ENSMUSG00000020218 | B | 0.0417037  | 0.0391698 | 0         | 0.173107 | 0.1351125 | 0.0146818 | 0.7211725 | 1.9031573 | 1.8841469 | 13.9623926 | 55.747267 | 3.9926729  |
| Cd53          | ENSMUSG00000040747 | B | 0.06331089 | 0.180771  | 0.0599022 | 0.108743 | 0.1640927 | 0.0891544 | 0.3457328 | 1.9469849 | 0.496883  | 7.70628619 | 9.176797  | 1.19081964 |
| Krt5          | ENSMUSG00000061527 | B | 0          | 0         | 0         | 0.494015 | 0.4169552 | 0.1853499 | 5.2709865 | 0.3957286 | 1.2081973 | 6.27089847 | #DIV/0!   | #DIV/0!    |
| Aldh1a1       | ENSMUSG00000053279 | B | 11.0948809 | 5.8304315 | 9.933415  | 11.78425 | 5.733351  | 6.6924389 | 46.65194  | 27.701315 | 33.640394 | 4.46069775 | 4.0208029 | 0.9013843  |
| Ccr7          | ENSMUSG00000037944 | B | 0.01793702 | 0.0943442 | 0.0424282 | 0.041078 | 0.0929804 | 0.0505178 | 0.0653012 | 1.5485223 | 0.4815992 | 11.3525991 | 13.544247 | 1.19305256 |
| Ccl4          | ENSMUSG00000018930 | B | 0.32254022 | 0.4039237 | 0         | 0.307776 | 0.1393297 | 0.0757001 | 1.3699402 | 3.4402502 | 1.3878251 | 11.8552877 | 8.5317592 | 0.71965856 |
| Ptn           | ENSMUSG00000029838 | B | 1.34465399 | 1.8563892 | 1.8841172 | 2.379152 | 2.8553037 | 1.9962026 | 1.8283742 | 8.0333654 | 9.9794131 | 2.74403127 | 3.9017752 | 1.42191355 |
| Retnlg        | ENSMUSG00000022651 | B | 0.05835432 | 0.1753879 | 0.0460104 | 0.10023  | 0         | 0.0821745 | 0.5311093 | 3.4086548 | 0.6628691 | 25.2331469 | 16.452507 | 0.65201964 |
| Ccl3          | ENSMUSG00000000982 | B | 0.04631779 | 0.208817  | 0         | 0.238667 | 0.1200491 | 0.195674  | 1.0960544 | 4.0384524 | 0.6696347 | 10.4694147 | 22.749317 | 2.17293112 |
| Crlf1         | ENSMUSG00000007888 | B | 0.0346648  | 0.4037264 | 0.2186564 | 3.463272 | 3.5489245 | 4.173678  | 13.534959 | 10.042499 | 6.6404076 | 2.70143095 | 45.990378 | 17.0244506 |
| Ovgp1         | ENSMUSG00000074340 | B | 1.50568546 | 3.2552326 | 5.9413115 | 12.62915 | 8.8871035 | 5.4838801 | 25.128028 | 32.79376  | 32.47575  | 3.34803987 | 8.4466081 | 2.5228517  |
| Tpsb2         | ENSMUSG00000033825 | B | 0.03176314 | 0.0238666 | 0.0751325 | 0.036371 | 0         | 0.0447288 | 0.4047272 | 1.0368313 | 0.3608097 | 22.2240576 | 13.783551 | 0.62020857 |
| lqgap3        | ENSMUSG00000028068 | B | 0.14856047 | 0.1953476 | 0.2635538 | 1.846933 | 1.1413906 | 0.9115263 | 1.9605694 | 5.4555749 | 4.4106564 | 3.03262954 | 19.469208 | 6.41990976 |
| C1qa          | ENSMUSG00000036887 | B | 0.30703348 | 0.2819698 | 0.2420857 | 0.312511 | 0.1768415 | 0.096081  | 0.6830883 | 2.6814237 | 0.9159646 | 7.31163394 | 5.1504429 | 0.7044175  |
| 4732456N10Rik | ENSMUSG00000048699 | B | 0.07000676 | 0.1157256 | 0.0772772 | 7.968173 | 3.3023438 | 3.1349541 | 85.074074 | 2.0266138 | 9.4994274 | 6.70579383 | 367.28748 | 54.7716636 |
| Cdk1          | ENSMUSG00000019942 | B | 0.22968675 | 0.2426974 | 0.4187946 | 1.779411 | 1.4324769 | 0.9804418 | 1.9728944 | 5.7958206 | 3.9062378 | 2.78483663 | 13.100573 | 4.70425173 |
| H2-Aa         | ENSMUSG00000036594 | B | 0.38463675 | 0.5680602 | 0.3241887 | 0.789748 | 0.1718833 | 0.5229678 | 1.8590217 | 5.2010938 | 1.7394766 | 5.92725168 | 6.8914486 | 1.16267184 |
| Cldn6         | ENSMUSG00000023906 | B | 0.14135229 | 0.3009312 | 0.5944085 | 0.445111 | 0.7327297 | 0.2985783 | 0.3001861 | 1.3862555 | 3.7222465 | 3.66338402 | 5.2172565 | 1.42416314 |
| Prc1          | ENSMUSG00000038943 | B | 0.21270373 | 0.3529445 | 0.4070457 | 0.939993 | 0.8786304 | 0.486735  | 1.177681  | 2.5532637 | 1.9951817 | 2.48383382 | 5.8868733 | 2.37007535 |
| C1qb          | ENSMUSG00000036905 | B | 0.19565859 | 0.3430382 | 0.179982  | 0.298724 | 0.1690397 | 0.5051315 | 0.8903892 | 2.8012302 | 0.9092295 | 4.72902865 | 6.4018154 | 1.35372734 |
| Tyropb        | ENSMUSG00000030579 | B | 0.31453391 | 0.425409  | 0.0991998 | 0.180082 | 0.1630453 | 0.4429264 | 1.4886128 | 2.59382   | 0.6496203 | 6.02001346 | 5.6391514 | 0.93673401 |
| Cdca5         | ENSMUSG00000024791 | B | 0.31485711 | 0.5105173 | 0.4181127 | 1.423159 | 1.4603258 | 0.8167555 | 1.4177469 | 5.80081   | 3.3370031 | 2.85266849 | 8.4886768 | 2.97569689 |
| Clec4e        | ENSMUSG00000030142 | B | 0.02816945 | 0.0423326 | 0.0444214 | 0.04032  | 0         | 0         | 0.1794681 | 1.2885436 | 0.3636223 | 45.4274044 | 15.937865 | 0.35084253 |
| Diap3         | ENSMUSG00000022021 | B | 0.15077886 | 0.1307239 | 0.1737537 | 1.075758 | 1.4730046 | 0.9799692 | 0.9289465 | 4.0749429 | 2.8026899 | 2.21229044 | 17.14765  | 7.7510845  |
| Plk4          | ENSMUSG00000025758 | B | 0.52796763 | 0.4189266 | 0.3230371 | 0.640834 | 0.7663131 | 0.3747157 | 0.5612561 | 2.5796929 | 1.5615015 | 2.63906422 | 3.702917  | 1.40311745 |
| Gzmb          | ENSMUSG00000015437 | B | 0.02502075 | 0.0564012 | 0.1578243 | 0.128927 | 0         | 0.0352342 | 0.1821802 | 2.0203626 | 0.490926  | 16.4074225 | 11.258146 | 0.6861618  |
| Calcb         | ENSMUSG00000030666 | B | 0.14752359 | 0.055424  | 0.0290794 | 1.098012 | 2.3897499 | 2.1293618 | 0.6042059 | 4.3244937 | 7.8837699 | 2.28096612 | 55.219734 | 24.2089234 |
| C1qc          | ENSMUSG00000036896 | B | 0.20210962 | 0.0828347 | 0.1014088 | 0.115715 | 0.2857304 | 0.1293685 | 0.4013437 | 1.1363913 | 0.2846084 | 3.43311236 | 4.7167817 | 1.37390835 |
| Ube2c         | ENSMUSG00000001403 | B | 0.57312917 | 0.7792621 | 0.9898616 | 2.437587 | 1.6976783 | 2.0369163 | 3.2043052 | 6.933605  | 4.6502817 | 2.39594225 | 6.3136616 | 2.63514764 |
| Kntc1         | ENSMUSG00000029414 | B | 0.09684084 | 0.0651059 | 0.0843932 | 0.811245 | 0.7926238 | 0.3875813 | 0.7515033 | 2.6685772 | 1.6790271 | 2.5604996  | 20.69947  | 8.08415268 |
| Pou2f3        | ENSMUSG00000032015 | B | 0.51021296 | 0.8060602 | 1.3925285 | 2.876209 | 2.000552  | 1.2895822 | 9.3349908 | 5.0795641 | 3.6206269 | 2.92477733 | 6.6579928 | 2.27641016 |
| Gad2          | ENSMUSG00000026787 | B | 0.02369244 | 0.253683  | 0.1401053 | 0.349293 | 0.1381666 | 0.1084319 | 1.606486  | 0.8954958 | 0.6238957 | 5.245719   | 7.4874784 | 1.42735026 |
| Racgap1       | ENSMUSG00000023015 | B | 0.09752453 | 0.1025909 | 0.110216  | 1.29354  | 0.8594166 | 0.7187144 | 1.4142672 | 3.316098  | 2.2122802 | 2.41763269 | 22.371718 | 9.25356363 |
| Kif4          | ENSMUSG00000034311 | B | 0.09920846 | 0.1304528 | 0.1368895 | 1.192808 | 0.9160402 | 0.6112106 | 1.2189711 | 3.4461496 | 2.1578473 | 2.50839037 | 18.613977 | 7.42068587 |
| Agt           | ENSMUSG00000031980 | B | 0.5441054  | 0.7189885 | 0.4585959 | 0.773428 | 0.3404035 | 0.2906309 | 4.6447772 | 1.0314927 | 0.7750097 | 4.59341534 | 3.7470627 | 0.81574654 |
| Ect2          | ENSMUSG00000027699 | B | 0.33483624 | 0.3078708 | 0.2674811 | 2.408933 | 1.998333  | 1.0174822 | 1.9888933 | 8.1614901 | 4.9227551 | 2.77858794 | 16.560465 | 5.96002902 |
| Cep55         | ENSMUSG00000024989 | B | 0.2705659  | 0.3093713 | 0.2968101 | 3.003879 | 2.6221324 | 1.5737398 | 1.8843816 | 10.302286 | 5.5638166 | 2.46543004 | 20.245839 | 8.21188937 |
| Chaf1a        | ENSMUSG0000002835  | B | 2.44513615 | 2.2684493 | 2.2721782 | 2.58558  | 2.3280399 | 1.2297282 | 1.9756371 | 8.2623289 | 4.9083334 | 2.46547972 | 2.1681666 | 0.87940962 |
| Ercc6l        | ENSMUSG00000051220 | B | 0.38811894 | 0.734102  | 0.8072568 | 1.402233 | 1.5436107 | 0.6502046 | 0.7673939 | 6.1449121 | 3.178753  | 2.80615185 | 5.2299431 | 1.86374201 |
| Ptprn         | ENSMUSG00000026204 | B | 0.09764979 | 0.1406322 | 0.2887261 | 0.386697 | 0.4640061 | 0.3437759 | 0.7406295 | 1.2407651 | 0.756301  | 2.29195832 | 5.1947891 | 2.26652862 |
| Kif18b        | ENSMUSG00000051378 | B | 0.0993265  | 0.0373166 | 0.1018103 | 0.671042 | 0.617856  | 0.09791   | 0.9040159 | 2.1842694 | 1.5283171 | 3.32894181 | 19.360605 | 5.81584359 |



|               |                    |   |            |           |           |          |           |           |           |           |           |            |           |            |
|---------------|--------------------|---|------------|-----------|-----------|----------|-----------|-----------|-----------|-----------|-----------|------------|-----------|------------|
| H2-Ab1        | ENSMUSG00000073421 | B | 0.71572326 | 0.8354935 | 0.4131658 | 1.309823 | 0.4306371 | 0.5219384 | 2.256679  | 4.3201912 | 1.7685771 | 3.68876154 | 4.2483818 | 1.15170951 |
| Tmem52        | ENSMUSG00000023153 | B | 0.43223664 | 0.5683637 | 0.6816085 | 0.464008 | 0.4667897 | 0.1775303 | 1.9014253 | 0.943716  | 0.9299133 | 3.40608134 | 2.2441057 | 0.65885264 |
| Mki67         | ENSMUSG00000031004 | B | 0.50710046 | 0.6403444 | 0.5580987 | 6.494185 | 4.4084872 | 4.4135253 | 7.8076393 | 15.768076 | 9.9751497 | 2.19054801 | 19.671656 | 8.98024397 |
| Sgol2         | ENSMUSG00000026039 | B | 0.22268924 | 0.167327  | 0.2265588 | 0.345477 | 0.3909919 | 0.1416217 | 0.3138266 | 1.5025801 | 0.6676397 | 2.82891796 | 4.028782  | 1.42414238 |
| 5730590G19Rik | ENSMUSG00000046591 | B | 0.09193943 | 0.134711  | 0.1123613 | 0.431636 | 0.4765876 | 0.1229956 | 0.5439088 | 2.1639812 | 0.8734775 | 3.47294378 | 10.564138 | 3.04183972 |
| Kif11         | ENSMUSG00000012443 | B | 0.53745549 | 1.0068337 | 0.6559663 | 1.968516 | 1.2594314 | 0.8605217 | 2.0772668 | 5.4959218 | 3.0411773 | 2.59617132 | 4.8241515 | 1.85817917 |
| Ncapg2        | ENSMUSG00000042029 | B | 1.56337259 | 1.7721511 | 1.588489  | 2.839054 | 2.7849053 | 1.4298662 | 2.6991034 | 9.0407626 | 4.5770489 | 2.31320091 | 3.3137435 | 1.43253595 |
| Emid1         | ENSMUSG00000034164 | B | 0.4363342  | 0.6557163 | 0.2418996 | 0.413759 | 0.6714811 | 0.1920142 | 0.359897  | 1.8038114 | 1.7741973 | 3.08310201 | 2.9520636 | 0.95749787 |
| Gsg2          | ENSMUSG00000050107 | B | 0.10100904 | 0.1328205 | 0.209061  | 0.491566 | 0.7199525 | 0.2667016 | 1.1721451 | 1.5672534 | 0.8996663 | 2.46178864 | 8.2166243 | 3.33766441 |
| Cnn2          | ENSMUSG00000004665 | B | 29.43497   | 15.495405 | 14.467765 | 14.17709 | 20.669061 | 7.2421797 | 35.481297 | 37.311343 | 39.903797 | 2.67761702 | 1.8973058 | 0.70857999 |
| Tesc          | ENSMUSG00000029359 | B | 0.28652625 | 0.2808178 | 0.5795248 | 0.905822 | 1.0009427 | 0.2631431 | 4.9661707 | 2.2151751 | 1.4408431 | 3.97352845 | 7.5180254 | 1.89202758 |
| Tmem48        | ENSMUSG00000028614 | B | 1.90885493 | 2.1579976 | 1.6115919 | 1.744128 | 1.1521524 | 0.7487257 | 2.3243813 | 3.9065411 | 2.7048014 | 2.45149755 | 1.5736218 | 0.64190223 |
| Ncaph         | ENSMUSG00000034906 | B | 0.62221379 | 1.0743165 | 0.6628251 | 1.766038 | 1.6984701 | 0.8575584 | 1.8073571 | 4.4948456 | 2.9324537 | 2.13662979 | 3.9140591 | 1.83188454 |
| Ccl6          | ENSMUSG00000018927 | B | 0.10400166 | 0.1116372 | 0.0117146 | 0.467851 | 0.192541  | 0.2301437 | 1.3251934 | 1.869739  | 0.6750828 | 4.34571743 | 17.022023 | 3.91696494 |
| Loxl2         | ENSMUSG00000034205 | C | 202.841714 | 155.25745 | 170.78156 | 1.598661 | 2.4443205 | 2.1613208 | 1.7278954 | 15.34459  | 3.7746143 | 3.36010379 | 0.0394174 | 0.011731   |
| Dennd2a       | ENSMUSG00000038456 | C | 66.3866353 | 68.540094 | 62.655201 | 1.414818 | 1.6398895 | 1.3532803 | 3.6615807 | 7.2604267 | 3.4086703 | 3.25107044 | 0.0725303 | 0.02230967 |
| Thy1          | ENSMUSG00000032011 | C | 105.722551 | 135.20014 | 91.259262 | 0.971757 | 0.7420208 | 0.6335252 | 2.1217435 | 5.1469012 | 2.3017899 | 4.07720516 | 0.0288108 | 0.00706632 |
| Plekhg1       | ENSMUSG00000040624 | C | 2.02158386 | 2.6285348 | 2.2612335 | 2.943175 | 1.4514821 | 2.5497362 | 0.6994042 | 0.880151  | 0.8713593 | 0.35293427 | 0.3546216 | 1.00478073 |
| Ramp3         | ENSMUSG00000041046 | C | 321.844789 | 232.86663 | 191.46495 | 1.714197 | 1.8236312 | 1.7075654 | 1.3625083 | 12.71177  | 3.6638583 | 3.38166006 | 0.023772  | 0.0070297  |
| Ptx3          | ENSMUSG00000027832 | C | 47.4043509 | 48.019428 | 72.235534 | 0.655265 | 1.0047394 | 0.85783   | 0.9744558 | 5.0663498 | 1.8109601 | 3.11845943 | 0.0468317 | 0.01501757 |
| Vcan          | ENSMUSG00000021614 | C | 23.9934016 | 14.150203 | 12.746389 | 0.251038 | 0.2225677 | 0.2216955 | 0.3007821 | 1.7524859 | 0.4111411 | 3.54437571 | 0.0484262 | 0.01366283 |
| Ccl7          | ENSMUSG00000035373 | C | 135.096436 | 172.0352  | 129.39446 | 2.307745 | 4.1329247 | 2.6197355 | 3.0638577 | 29.012491 | 4.6655873 | 4.05521997 | 0.0841689 | 0.0207557  |
| Bach2         | ENSMUSG00000040270 | C | 1.47326299 | 1.6405518 | 2.0367577 | 0.306812 | 0.3268074 | 0.2172773 | 0.8758026 | 1.0090245 | 0.8840547 | 3.2540755  | 0.5375872 | 0.16520428 |
| Xylt1         | ENSMUSG00000030657 | C | 2.64946285 | 3.2496653 | 6.8138708 | 0.129384 | 0.1817743 | 0.098761  | 0.1418469 | 1.1881695 | 0.2816496 | 3.93167041 | 0.1267731 | 0.03224407 |
| Tnc           | ENSMUSG00000028364 | C | 8.65918425 | 10.154982 | 18.173091 | 0.40423  | 0.2715399 | 0.2501633 | 1.0530271 | 1.7686196 | 0.5832821 | 3.67729268 | 0.0920568 | 0.02503385 |
| Dio2          | ENSMUSG00000007682 | C | 171.708696 | 172.98748 | 151.32521 | 2.610353 | 1.7401227 | 1.8307117 | 3.888528  | 14.169126 | 4.2544372 | 3.60967728 | 0.0449821 | 0.01246153 |
| P2ry14        | ENSMUSG00000036381 | C | 190.04936  | 126.9117  | 76.403423 | 0.980051 | 0.7715949 | 0.748608  | 0.6773753 | 6.7494118 | 1.4822322 | 3.56324598 | 0.0226483 | 0.00635607 |
| S1pr3         | ENSMUSG00000067586 | C | 1.83568834 | 6.6171787 | 2.1398755 | 2.912892 | 2.5224758 | 3.2869802 | 0.7777601 | 1.1690701 | 0.5556253 | 0.28690159 | 0.2362424 | 0.82342676 |
| Has2          | ENSMUSG00000022367 | C | 28.3366469 | 25.05452  | 28.997721 | 0.345186 | 0.3038485 | 0.330172  | 0.2896094 | 2.5319895 | 0.5620741 | 3.45552596 | 0.0410695 | 0.01188517 |
| Tmem200a      | ENSMUSG00000049420 | C | 52.4018602 | 130.63977 | 69.916921 | 0.46792  | 1.2460376 | 0.6092939 | 0.5250642 | 11.986532 | 2.6808719 | 6.53931319 | 0.0600591 | 0.00918432 |
| Cdr2l         | ENSMUSG00000050910 | C | 50.0931119 | 85.618512 | 71.470683 | 0.92782  | 1.4414971 | 1.3368237 | 1.8327578 | 5.5930119 | 1.9012454 | 2.51663777 | 0.0450184 | 0.01788831 |
| A2m           | ENSMUSG00000030111 | C | 318.714634 | 150.42621 | 96.927827 | 1.157028 | 0.6891895 | 0.8130877 | 1.853128  | 6.0628459 | 1.5220311 | 3.54904991 | 0.0166729 | 0.00469785 |
| Fn1           | ENSMUSG00000026193 | C | 313.06438  | 280.37365 | 207.72723 | 13.13613 | 9.7219501 | 4.8121441 | 50.952525 | 50.01773  | 23.937495 | 4.51415801 | 0.1559076 | 0.03453747 |
| Ccl8          | ENSMUSG00000009185 | C | 20.8988391 | 6.7821245 | 18.722559 | 0.159008 | 0.3599122 | 0.1955464 | 0.7583119 | 2.0576708 | 0.5735982 | 4.74421395 | 0.0730458 | 0.01539681 |
| Mmrrn1        | ENSMUSG00000054641 | C | 9.56113724 | 25.903812 | 6.4206936 | 0.177286 | 0.1971223 | 0.0688499 | 0.1681074 | 1.8362962 | 0.3646467 | 5.34462901 | 0.05656   | 0.01058258 |
| Rad18         | ENSMUSG00000030254 | C | 5.6751325  | 10.462884 | 14.618143 | 0.705192 | 0.8630593 | 0.6050512 | 0.9320168 | 3.5094052 | 1.5973224 | 2.77860244 | 0.1963426 | 0.07066236 |
| Larp6         | ENSMUSG00000034839 | C | 49.1331868 | 44.249513 | 54.73342  | 0.47453  | 0.4522504 | 0.757622  | 0.2911524 | 3.9470711 | 0.961012  | 3.08669389 | 0.0351024 | 0.01137218 |
| Scube1        | ENSMUSG00000016763 | C | 72.3435059 | 55.893695 | 53.61545  | 0.312427 | 0.2928387 | 0.4197642 | 0.2975565 | 2.1042384 | 0.5784125 | 2.907436   | 0.016388  | 0.00563659 |
| Tnfaip8l3     | ENSMUSG00000074345 | C | 20.2033398 | 23.040536 | 13.377397 | 0.127814 | 0.330634  | 0.2694585 | 0.1161041 | 1.8286431 | 0.5434037 | 3.41823072 | 0.0439437 | 0.0128557  |
| Crtac1        | ENSMUSG00000042401 | C | 74.2816546 | 27.718803 | 27.856721 | 0.12424  | 0.2812158 | 0.2482826 | 0.0987506 | 1.5436749 | 0.3081226 | 2.98368314 | 0.0150207 | 0.00503429 |
| Nppc          | ENSMUSG00000026241 | C | 111.370696 | 96.284109 | 156.95675 | 2.90189  | 3.4384903 | 2.874138  | 2.9721754 | 17.941624 | 5.3043394 | 2.84530767 | 0.071907  | 0.02527215 |
| Loxl1         | ENSMUSG00000032334 | C | 47.3998847 | 26.933599 | 33.511583 | 0.505215 | 0.4465931 | 0.3970498 | 0.6748176 | 2.5521165 | 0.9220306 | 3.07590955 | 0.0384715 | 0.01250737 |
| Twist2        | ENSMUSG0000007805  | C | 106.812022 | 252.76872 | 136.98801 | 1.100491 | 1.8682126 | 2.3308127 | 1.5550434 | 13.656345 | 2.9498332 | 3.42695837 | 0.0365734 | 0.01067227 |
| Chst13        | ENSMUSG00000056643 | C | 22.3707335 | 12.57864  | 13.690657 | 0.282983 | 0.6126792 | 0.4841875 | 0.7041139 | 2.1136648 | 0.9320536 | 2.71756659 | 0.0770935 | 0.02836859 |
| Nts           | ENSMUSG00000019890 | C | 5.79255912 | 22.261143 | 5.042995  | 0.155458 | 0.1563904 | 0.0424848 | 0         | 1.7752558 | 0.2803973 | 5.80146271 | 0.0621105 | 0.01070601 |
| Slc4a4        | ENSMUSG00000060961 | C | 9.13042104 | 13.208917 | 19.846047 | 13.3866  | 6.9190843 | 9.8820416 | 3.8926535 | 5.3267725 | 5.1469393 | 0.47590086 | 0.3405531 | 0.71559683 |

|          |                    |   |            |           |           |          |           |           |           |           |           |            |           |            |
|----------|--------------------|---|------------|-----------|-----------|----------|-----------|-----------|-----------|-----------|-----------|------------|-----------|------------|
| Bdkrb2   | ENSMUSG00000021070 | C | 80.8001658 | 172.22009 | 126.31751 | 0.79802  | 1.5326262 | 1.5167066 | 1.0379394 | 8.1817264 | 2.3335288 | 3.00289474 | 0.0304562 | 0.01014229 |
| Lyve1    | ENSMUSG00000030787 | C | 13.418762  | 53.532677 | 13.016067 | 0.69347  | 0.4938266 | 0.4216211 | 1.1643253 | 3.6591566 | 0.7729659 | 3.47839191 | 0.069984  | 0.02011965 |
| Mn1      | ENSMUSG00000070576 | C | 12.555831  | 12.303843 | 9.7426517 | 0.828335 | 1.0997808 | 0.7631099 | 3.4431803 | 2.3516771 | 1.1244983 | 2.57107989 | 0.1999679 | 0.07777586 |
| Bdkrb1   | ENSMUSG00000041347 | C | 17.1563436 | 24.327801 | 20.405804 | 0.349181 | 0.8247316 | 0.5227723 | 0.3378776 | 4.7151111 | 0.848876  | 3.4784681  | 0.0953606 | 0.02741455 |
| Npr2     | ENSMUSG00000028469 | C | 48.4958462 | 52.265655 | 46.524873 | 1.586105 | 0.9767275 | 0.97529   | 5.5340876 | 3.9020851 | 1.8563829 | 3.19167985 | 0.0766707 | 0.02402207 |
| Serpinh1 | ENSMUSG00000070436 | C | 1315.90053 | 728.64921 | 881.6573  | 18.61976 | 26.171088 | 18.958924 | 19.626835 | 89.942704 | 38.71502  | 2.32604047 | 0.0506747 | 0.02178581 |
| Mafb     | ENSMUSG00000074622 | C | 20.3307886 | 11.941077 | 15.749501 | 8.109707 | 7.6789594 | 11.322187 | 3.3158524 | 2.8597841 | 4.3352233 | 0.38769933 | 0.2188788 | 0.56455815 |
| Gm12473  | ENSMUSG00000086043 | C | 34.6215456 | 26.290621 | 30.824931 | 0.771833 | 0.4764641 | 0.8629033 | 3.346264  | 2.8161314 | 1.3921396 | 3.57831344 | 0.0823498 | 0.02301359 |
| Osr1     | ENSMUSG00000048387 | C | 24.3590079 | 27.852651 | 22.755255 | 0.242546 | 0.4575004 | 0.2734244 | 0.2891771 | 1.675498  | 0.6379853 | 2.67358857 | 0.0347175 | 0.01298534 |
| Ccl2     | ENSMUSG00000035385 | C | 228.807994 | 209.1253  | 215.06818 | 3.320088 | 8.1614367 | 5.7513488 | 3.2915711 | 50.817959 | 11.043088 | 3.78071691 | 0.0997741 | 0.02639025 |
| Ddit4l   | ENSMUSG00000046818 | C | 100.867124 | 182.14104 | 91.997678 | 1.678779 | 2.9273302 | 1.7739833 | 1.8186796 | 14.417753 | 3.611149  | 3.11086093 | 0.0529261 | 0.01701332 |
| Ctsl     | ENSMUSG00000021477 | C | 230.212064 | 227.67432 | 330.12565 | 504.8686 | 366.9922  | 771.59189 | 54.674735 | 161.62273 | 183.23002 | 0.24310252 | 0.5070068 | 2.08556798 |
| Htr2a    | ENSMUSG00000034997 | C | 5.07531318 | 4.5583153 | 3.7851527 | 0.191441 | 0.2166621 | 0.1177162 | 0.2825909 | 1.1540578 | 0.3206338 | 3.34199169 | 0.1309569 | 0.0391853  |
| Cfh      | ENSMUSG00000026365 | C | 22.2596463 | 26.645947 | 28.527621 | 56.89242 | 38.148192 | 73.427389 | 9.1698092 | 20.343682 | 27.218383 | 0.33675164 | 0.7326556 | 2.17565547 |
| Oxtr     | ENSMUSG00000049112 | C | 78.872424  | 64.871887 | 93.823346 | 0.722072 | 1.6523627 | 1.5905903 | 1.236157  | 8.7056982 | 2.2899114 | 3.0849156  | 0.0514875 | 0.01669009 |
| Slc16a10 | ENSMUSG00000019838 | C | 16.9857124 | 17.091954 | 24.080676 | 3.175227 | 2.8777008 | 2.3180298 | 4.6856032 | 8.2136622 | 7.7464107 | 2.46634584 | 0.3549908 | 0.14393391 |
| Fam71a   | ENSMUSG00000091017 | C | 4.73270749 | 5.2625802 | 10.831608 | 3.955351 | 1.2348824 | 3.3322975 | 2.1103632 | 1.0095463 | 1.0332277 | 0.48731265 | 0.1994122 | 0.40920794 |
| Trim35   | ENSMUSG00000022043 | C | 32.437577  | 29.876684 | 32.38615  | 4.10269  | 3.7282409 | 1.9234061 | 7.8911962 | 10.392465 | 10.323127 | 2.9327249  | 0.3020767 | 0.10300206 |
| Rasl11a  | ENSMUSG00000029641 | C | 10.1774904 | 10.441034 | 10.35995  | 5.700693 | 3.3483664 | 4.5702453 | 2.8104457 | 2.0029542 | 1.9523224 | 0.49677443 | 0.2184008 | 0.43963768 |
| Pdpn     | ENSMUSG00000028583 | C | 28.6938444 | 52.671825 | 40.148645 | 4.666263 | 3.3914806 | 2.869267  | 17.285622 | 10.011933 | 5.2506294 | 2.9786906  | 0.2678547 | 0.08992365 |
| Fkbp10   | ENSMUSG00000001555 | C | 64.9041329 | 30.479477 | 30.631093 | 0.783567 | 0.7857703 | 1.1709867 | 0.6937616 | 3.8654788 | 1.8873879 | 2.35250596 | 0.0511577 | 0.02174606 |
| Gm889    | ENSMUSG00000071342 | C | 1.60871257 | 2.4615039 | 3.0211375 | 2.763135 | 1.1371505 | 2.3889544 | 1.0116035 | 0.9296482 | 0.7853282 | 0.4335309  | 0.3844936 | 0.88688846 |
| Mmp19    | ENSMUSG00000025355 | C | 400.272417 | 1014.1899 | 744.62633 | 5.027673 | 12.539669 | 9.7140386 | 5.0378446 | 65.767693 | 16.277846 | 3.19204456 | 0.0403334 | 0.0126356  |
| Angptl4  | ENSMUSG00000002289 | C | 19.6366469 | 22.856176 | 22.760196 | 0.45503  | 0.5635608 | 0.7390843 | 0.3684992 | 2.6406863 | 0.9446127 | 2.24944761 | 0.0605918 | 0.0269363  |
| Dclk1    | ENSMUSG00000027797 | C | 9.29738115 | 6.5466959 | 6.5955784 | 0.359787 | 0.5940929 | 0.4352099 | 0.323477  | 1.6581591 | 1.0452209 | 2.17902155 | 0.1348887 | 0.06190336 |
| Col14a1  | ENSMUSG00000022371 | C | 33.4557833 | 25.3326   | 18.169513 | 1.339168 | 0.9422813 | 0.7833564 | 1.2198991 | 4.5603198 | 2.6370733 | 2.74643548 | 0.1093753 | 0.03982445 |
| Smoc2    | ENSMUSG00000023886 | C | 152.646914 | 192.09891 | 139.44242 | 1.920085 | 1.6678737 | 2.1783266 | 3.4239972 | 7.5794821 | 2.709236  | 2.3780846  | 0.028321  | 0.01190918 |
| Fbn1     | ENSMUSG00000027204 | C | 103.827449 | 45.621965 | 69.012267 | 1.061415 | 0.6496723 | 0.9890371 | 1.1564928 | 4.9139879 | 1.3454992 | 2.74653321 | 0.0339464 | 0.01235971 |
| Zeb2     | ENSMUSG00000026872 | C | 25.9938248 | 25.595302 | 17.620666 | 0.425991 | 0.420304  | 0.4943284 | 0.3646397 | 2.2960056 | 0.5516375 | 2.39611067 | 0.0464137 | 0.01937043 |
| Lphn1    | ENSMUSG00000013033 | C | 15.22338   | 18.262805 | 13.305796 | 0.495479 | 0.5034058 | 0.3635244 | 0.8010767 | 1.4646293 | 0.7972084 | 2.2481607  | 0.0654581 | 0.02911629 |
| Ccdc80   | ENSMUSG00000022665 | C | 55.1382736 | 37.081291 | 50.788382 | 2.380677 | 2.7102614 | 2.9797091 | 2.4520898 | 7.3868557 | 7.2095686 | 2.11240982 | 0.1192138 | 0.05643496 |
| Pvrl1    | ENSMUSG00000032012 | C | 27.5046271 | 49.145546 | 26.78984  | 1.732292 | 1.6193558 | 1.0775364 | 3.5779997 | 4.127774  | 2.9722634 | 2.41083634 | 0.1032293 | 0.04281886 |
| Col6a3   | ENSMUSG00000048126 | C | 654.802779 | 220.73194 | 268.52504 | 5.838362 | 6.142494  | 7.8929307 | 5.0954298 | 31.824029 | 7.5278932 | 2.23648132 | 0.0388506 | 0.01737128 |
| Col6a6   | ENSMUSG00000043719 | C | 66.902753  | 30.143411 | 20.782722 | 0.361293 | 0.2259664 | 0.2689277 | 0.3022836 | 1.6618841 | 0.4801687 | 2.85490853 | 0.0207448 | 0.00726636 |
| Col6a4   | ENSMUSG00000032572 | C | 1150.42819 | 590.2537  | 524.97615 | 8.192456 | 7.1151334 | 9.7004459 | 6.8965395 | 41.63397  | 10.487284 | 2.35995326 | 0.0260489 | 0.01103787 |
| Adam12   | ENSMUSG00000054555 | C | 38.719942  | 31.888264 | 17.079978 | 0.308895 | 0.219868  | 0.2914774 | 0.3520682 | 1.4909317 | 0.3328869 | 2.65274369 | 0.0248139 | 0.00935406 |
| Spon2    | ENSMUSG00000037379 | C | 338.807094 | 248.1417  | 212.31493 | 2.72417  | 2.7542054 | 4.2658743 | 2.5117174 | 16.485309 | 4.225639  | 2.38321731 | 0.0290551 | 0.01219153 |
| Cmtm3    | ENSMUSG00000031875 | C | 85.2296573 | 83.292772 | 78.625926 | 2.979106 | 2.7883175 | 1.9168627 | 5.3153002 | 7.7230748 | 4.7838744 | 2.31931099 | 0.0721115 | 0.0310918  |
| Fstl1    | ENSMUSG00000022816 | C | 226.352676 | 167.55599 | 150.69842 | 3.139225 | 3.152919  | 2.8829109 | 2.6896038 | 15.299861 | 3.419356  | 2.33337263 | 0.0393106 | 0.01684711 |
| Mpdz     | ENSMUSG00000028402 | C | 8.77917526 | 7.6820416 | 8.0228386 | 0.376708 | 0.38261   | 0.2227269 | 0.6948112 | 1.0063116 | 0.5030619 | 2.24448581 | 0.0900253 | 0.04010955 |
| Pdk4     | ENSMUSG00000019577 | C | 37.4398371 | 105.85379 | 41.941605 | 0.607488 | 1.3095639 | 0.88227   | 0.9013278 | 4.6744721 | 1.5444347 | 2.54355727 | 0.0384389 | 0.01511225 |
| Mfap2    | ENSMUSG00000060572 | C | 46.2839259 | 24.700197 | 25.854297 | 0.882368 | 0.9348737 | 0.7388111 | 2.3278493 | 2.4787522 | 0.9989262 | 2.27128668 | 0.0599507 | 0.02639502 |
| Snai2    | ENSMUSG00000022676 | C | 32.1777942 | 21.618571 | 30.908144 | 0.530084 | 0.9055399 | 0.6641933 | 0.5723743 | 2.8211464 | 0.8659045 | 2.02847398 | 0.0502857 | 0.02478991 |
| Des      | ENSMUSG00000026208 | C | 107.854521 | 135.04396 | 157.06452 | 3.341267 | 3.5441323 | 3.7594789 | 3.2743335 | 15.665194 | 4.2698784 | 2.18033541 | 0.0580289 | 0.02661466 |
| Mfap4    | ENSMUSG00000042436 | C | 293.919882 | 227.01536 | 125.07442 | 2.657005 | 2.1163999 | 2.2422576 | 2.5516065 | 11.655524 | 3.1480792 | 2.47378082 | 0.0268652 | 0.01086    |
| Fam65b   | ENSMUSG00000036006 | C | 11.4030001 | 15.430346 | 7.3952074 | 0.405833 | 0.3195129 | 0.3134385 | 0.835258  | 1.2178011 | 0.4172718 | 2.37809725 | 0.0721716 | 0.03034848 |

|         |                    |   |            |           |           |          |           |           |           |           |           |            |           |            |
|---------|--------------------|---|------------|-----------|-----------|----------|-----------|-----------|-----------|-----------|-----------|------------|-----------|------------|
| Igfbp6  | ENSMUSG00000023046 | C | 537.041074 | 443.493   | 489.80269 | 9.663397 | 10.750436 | 11.951365 | 10.279831 | 45.085699 | 12.190895 | 2.08731689 | 0.0459462 | 0.0220121  |
| Tmem47  | ENSMUSG00000025666 | C | 21.8175691 | 20.206421 | 13.765674 | 1.005672 | 1.2263054 | 0.7245712 | 0.9689049 | 3.6553556 | 1.6551185 | 2.12388802 | 0.1125545 | 0.05299457 |
| Lgals1  | ENSMUSG00000068220 | C | 719.434032 | 628.05192 | 587.11166 | 18.63739 | 14.02353  | 13.864482 | 19.051954 | 64.421571 | 28.211709 | 2.40052175 | 0.0577305 | 0.02404914 |
| Msc     | ENSMUSG00000025930 | C | 31.3053746 | 23.429458 | 58.474048 | 0.118307 | 0.2677856 | 0.4364773 | 0.4513656 | 1.730661  | 0.3414195 | 3.06776084 | 0.0222902 | 0.00726594 |
| Fam38b  | ENSMUSG00000041482 | C | 1.56053605 | 2.7420912 | 6.0196958 | 0.454264 | 0.3567297 | 0.2736244 | 1.3337331 | 0.9058541 | 0.4995505 | 2.52544101 | 0.2653606 | 0.10507495 |
| Mrgprf  | ENSMUSG00000031070 | C | 16.8417935 | 13.360945 | 11.224955 | 0.186458 | 0.2652854 | 0.2227526 | 0.1693755 | 1.0630716 | 0.2402215 | 2.18336267 | 0.0355479 | 0.01628127 |
| Tmem100 | ENSMUSG00000069763 | C | 58.0481135 | 94.279502 | 62.075509 | 1.517457 | 2.0296239 | 2.0923573 | 0.9868354 | 8.3567022 | 1.9076116 | 1.99508341 | 0.0524766 | 0.02630297 |
| Lhfp12  | ENSMUSG00000045312 | C | 13.4743953 | 14.952536 | 12.373442 | 0.521518 | 0.7347202 | 0.7291795 | 0.8944046 | 1.6672139 | 0.9094268 | 1.7482698  | 0.0850739 | 0.04866175 |
| Rcn3    | ENSMUSG00000019539 | C | 228.52515  | 118.93911 | 126.32871 | 3.472422 | 3.1599167 | 3.7161892 | 3.4552832 | 15.271834 | 4.0798074 | 2.20388103 | 0.0481369 | 0.02184188 |
| Ppic    | ENSMUSG00000024538 | C | 141.807342 | 113.66338 | 103.78353 | 6.965889 | 3.7898534 | 3.1857637 | 17.225453 | 16.032621 | 7.4359799 | 2.91891369 | 0.1132737 | 0.0388068  |
| Foxl2   | ENSMUSG00000050397 | C | 31.6498994 | 37.407184 | 29.317562 | 0.411101 | 0.2919288 | 0.4560033 | 0.3587939 | 2.0983437 | 0.4943301 | 2.54649117 | 0.0300023 | 0.01178183 |
| Col6a2  | ENSMUSG00000020241 | C | 1267.81366 | 547.51429 | 708.98673 | 11.44972 | 10.509437 | 16.102549 | 11.634958 | 53.030285 | 14.239335 | 2.07307015 | 0.0312578 | 0.01507803 |
| Vgll3   | ENSMUSG00000091243 | C | 65.3197353 | 40.887246 | 79.241008 | 0.75823  | 0.9411672 | 1.3686186 | 0.7581977 | 3.9128852 | 1.8308262 | 2.11925535 | 0.0350606 | 0.01654381 |
| Atp8b2  | ENSMUSG00000060671 | C | 32.9791511 | 31.587114 | 27.429719 | 1.471691 | 2.2833842 | 1.1704385 | 2.1189588 | 4.4482663 | 3.863586  | 2.1177102  | 0.1133833 | 0.05354053 |
| Mdk     | ENSMUSG00000027239 | C | 63.7414074 | 74.667939 | 38.831632 | 1.848634 | 1.6245182 | 1.6850172 | 2.0398238 | 6.00411   | 3.1382084 | 2.16785076 | 0.06309   | 0.02910258 |
| Nrg1    | ENSMUSG00000062991 | C | 26.4718536 | 26.39069  | 37.875564 | 0.525644 | 0.5816753 | 0.7038939 | 0.6313452 | 2.1951078 | 0.8322162 | 2.02001003 | 0.0403212 | 0.01996089 |
| Fbln2   | ENSMUSG00000064080 | C | 279.887525 | 90.258241 | 206.46873 | 1.669177 | 1.3533727 | 2.5067393 | 2.2394114 | 8.901272  | 2.4836948 | 2.46403795 | 0.0236282 | 0.00958923 |
| Selm    | ENSMUSG00000075702 | C | 41.5643495 | 24.336882 | 27.917683 | 1.110987 | 1.0555562 | 1.3831506 | 2.3112042 | 3.4469695 | 1.4101278 | 2.01941412 | 0.0764057 | 0.03783559 |
| Cgref1  | ENSMUSG00000029161 | C | 8.33552747 | 6.7048906 | 6.4880269 | 0.55066  | 1.4541484 | 1.0534177 | 0.5349487 | 3.3736261 | 2.7865187 | 2.18920827 | 0.3109883 | 0.14205513 |
| Mdk-ps1 | ENSMUSG00000081677 | C | 50.8427891 | 67.021139 | 35.904773 | 1.202341 | 1.1458888 | 2.0233872 | 1.8107354 | 4.8896738 | 2.8534722 | 2.18543443 | 0.0621315 | 0.02842982 |
| Lgr6    | ENSMUSG00000042793 | C | 11.0767478 | 3.959066  | 6.7428902 | 0.197285 | 0.4059579 | 0.3705471 | 0.7869009 | 0.9202954 | 0.213504  | 1.97239598 | 0.0881917 | 0.04471296 |
| Col6a1  | ENSMUSG00000001119 | C | 2219.77791 | 1077.5481 | 1322.8337 | 21.32997 | 18.918101 | 29.330878 | 19.436507 | 97.779723 | 25.876242 | 2.05654841 | 0.0309713 | 0.01505986 |
| Cplx2   | ENSMUSG00000025867 | C | 19.6019318 | 17.521842 | 12.280313 | 0.569183 | 0.4481181 | 0.5275186 | 1.3506677 | 1.4449684 | 0.5802659 | 2.18530496 | 0.0683324 | 0.03126906 |
| Col5a3  | ENSMUSG00000004098 | C | 50.549332  | 15.555239 | 23.388125 | 0.666633 | 0.5317772 | 0.5489547 | 0.569547  | 2.7890971 | 0.7203769 | 2.33438373 | 0.0455794 | 0.01952523 |
| Syde1   | ENSMUSG00000032714 | C | 13.2292502 | 10.345754 | 13.391614 | 1.019368 | 1.7899285 | 0.744569  | 1.060668  | 4.3380219 | 3.5546557 | 2.51932582 | 0.2422008 | 0.09613716 |
| Gli3    | ENSMUSG00000021318 | C | 10.9365344 | 11.728273 | 12.608466 | 0.278645 | 0.3784262 | 0.2741405 | 0.2594453 | 1.128792  | 0.3877099 | 1.9071356  | 0.0503482 | 0.02639993 |
| Dcbld2  | ENSMUSG00000035107 | C | 32.9032652 | 31.673217 | 45.537419 | 1.318258 | 2.1552024 | 1.4933417 | 0.857401  | 5.9551042 | 2.6956519 | 1.91434179 | 0.0863484 | 0.04510604 |
| Fzd2    | ENSMUSG00000050288 | C | 32.125113  | 18.252721 | 15.483047 | 1.780487 | 2.6867428 | 1.1430138 | 2.1183474 | 5.85942   | 4.60507   | 2.24283262 | 0.1910518 | 0.08518325 |
| Col4a3  | ENSMUSG00000079465 | C | 15.8813638 | 8.1265441 | 10.348301 | 0.262081 | 0.2302038 | 0.2838209 | 0.2487306 | 1.0373344 | 0.3809905 | 2.14797489 | 0.0485227 | 0.02258997 |
| Rspo1   | ENSMUSG00000028871 | C | 27.3565037 | 25.01032  | 17.520777 | 1.327487 | 0.8066454 | 1.0299205 | 4.532133  | 2.559833  | 1.1409383 | 2.60201199 | 0.1178021 | 0.04527346 |
| Fgfr1   | ENSMUSG00000031565 | C | 11.4135491 | 16.816068 | 18.718545 | 0.436365 | 0.7945204 | 0.5174202 | 0.4930284 | 2.2689401 | 0.7523724 | 2.01014055 | 0.0748558 | 0.03723907 |
| Igf1    | ENSMUSG00000020053 | C | 41.4063487 | 35.792553 | 39.795251 | 0.772708 | 0.5274813 | 0.7944059 | 0.7571608 | 3.083163  | 0.8388123 | 2.23390936 | 0.0399946 | 0.01790342 |
| Gdf10   | ENSMUSG00000021943 | C | 23.9146419 | 29.302174 | 21.010522 | 0.324147 | 0.2152199 | 0.3082768 | 0.5084185 | 0.9888939 | 0.3897722 | 2.22627043 | 0.025423  | 0.01141956 |
| Thbs2   | ENSMUSG00000023885 | C | 45.5180605 | 51.703191 | 81.619779 | 1.706764 | 3.1030057 | 3.3043939 | 1.6562511 | 11.284397 | 2.9486425 | 1.95821676 | 0.0888459 | 0.04537081 |
| Mfap5   | ENSMUSG00000030116 | C | 45.063679  | 27.860108 | 31.956344 | 0.477863 | 0.3483241 | 0.4482246 | 0.4248875 | 2.0263572 | 0.4966953 | 2.31317701 | 0.0281077 | 0.01215113 |
| Hsd11b2 | ENSMUSG00000031891 | C | 1014.88461 | 610.38195 | 579.80441 | 7.090363 | 4.7847844 | 6.6074537 | 4.9005991 | 27.966511 | 8.9362397 | 2.26176769 | 0.0189578 | 0.00838186 |
| Gfpt2   | ENSMUSG00000020363 | C | 33.1568581 | 58.405594 | 67.571739 | 1.387883 | 1.6776377 | 1.948084  | 1.4785567 | 5.4647787 | 2.0118127 | 1.7861696  | 0.0562742 | 0.03150551 |
| Tfpi2   | ENSMUSG00000029664 | C | 7.35096575 | 10.193134 | 10.184126 | 1.101959 | 0.6611329 | 0.3592046 | 4.0944711 | 2.4800225 | 0.9099779 | 3.52659007 | 0.2699225 | 0.07653923 |
| Tmem45a | ENSMUSG00000022754 | C | 17.8922901 | 9.4162403 | 9.5199407 | 0.41931  | 0.1318199 | 0.3151279 | 0.7406295 | 1.4155207 | 0.4831923 | 3.04683338 | 0.0716658 | 0.02352141 |
| Col5a1  | ENSMUSG00000026837 | C | 310.003644 | 143.78176 | 174.11747 | 3.702776 | 3.5388432 | 4.1298513 | 3.3383393 | 14.739006 | 4.3842822 | 1.97526153 | 0.0357725 | 0.01811024 |
| Qpct    | ENSMUSG00000024084 | C | 35.2950201 | 29.430168 | 28.308762 | 0.348408 | 0.716925  | 0.7011313 | 0.3356699 | 3.2552508 | 0.8378886 | 2.50716074 | 0.0476042 | 0.01898731 |
| Mdfic   | ENSMUSG00000041390 | C | 4.04662702 | 7.2707845 | 4.302628  | 0.916972 | 0.842168  | 0.4608092 | 1.4849536 | 2.1735625 | 1.0280507 | 2.11111488 | 0.3000355 | 0.14212184 |
| Actg2   | ENSMUSG00000059430 | D | 3.90931941 | 2.2207393 | 1.0910102 | 0.323043 | 0.313373  | 0.2837681 | 1.5161452 | 4.3910052 | 1.5537756 | 8.10808285 | 1.0332163 | 0.1274304  |
| Cd44    | ENSMUSG00000005087 | D | 22.4342898 | 33.207352 | 29.932441 | 3.752545 | 6.7876115 | 4.0772967 | 24.485387 | 20.667206 | 15.550944 | 4.152812   | 0.7093682 | 0.17081636 |
| Dlgap1  | ENSMUSG00000003279 | D | 3.08357418 | 1.8188704 | 1.5417761 | 0.441841 | 0.2475072 | 0.2001486 | 2.075821  | 0.9610029 | 1.181076  | 4.74189573 | 0.6545244 | 0.13803012 |
| Pcp4    | ENSMUSG00000090223 | D | 1.05165221 | 2.4537894 | 0.9601181 | 0.316899 | 0.5738382 | 0.38972   | 1.4105469 | 2.7339307 | 1.4289619 | 4.3526948  | 1.2480943 | 0.28674059 |

|         |                    |   |            |           |           |          |           |           |           |           |           |            |           |            |
|---------|--------------------|---|------------|-----------|-----------|----------|-----------|-----------|-----------|-----------|-----------|------------|-----------|------------|
| Cd83    | ENSMUSG00000015396 | D | 0.99875056 | 4.0024185 | 1.1374736 | 0.326754 | 0.2054459 | 0.3795155 | 0.6060057 | 2.1720924 | 0.7530719 | 3.8731042  | 0.5752363 | 0.14852074 |
| Chst1   | ENSMUSG00000027221 | D | 2.2770377  | 2.9742653 | 2.2650873 | 0.629104 | 1.235251  | 0.5592772 | 1.6145724 | 2.4450141 | 4.1560184 | 3.3897906  | 1.0930253 | 0.32244627 |
| Sdc3    | ENSMUSG00000025743 | D | 7.68355547 | 10.166819 | 5.815339  | 1.817981 | 2.0882001 | 0.9259965 | 5.2623899 | 4.954038  | 4.3618817 | 3.01692317 | 0.6160097 | 0.20418476 |
| Fcer1g  | ENSMUSG00000058715 | D | 0.62088993 | 1.0996824 | 1.0490381 | 0.355482 | 0.2298939 | 0.3122631 | 1.049472  | 2.7810613 | 0.5495787 | 4.87959446 | 1.5814904 | 0.32410283 |
| Nkain1  | ENSMUSG00000078532 | D | 5.86689545 | 7.0094695 | 6.4345389 | 2.133207 | 3.6393868 | 2.0556506 | 4.0490843 | 6.5266029 | 7.0635513 | 2.25328142 | 0.9134341 | 0.40537951 |
| Cdc7    | ENSMUSG00000029283 | D | 0.66049498 | 0.7370289 | 0.6490298 | 0.400733 | 0.4343648 | 0.3054088 | 0.4575893 | 1.2152    | 0.9060389 | 2.2611246  | 1.2600833 | 0.55728167 |
| Tgfb1i1 | ENSMUSG00000030782 | D | 15.0855423 | 8.6143451 | 10.142554 | 1.009086 | 1.4721872 | 0.6704743 | 1.4596723 | 2.7517544 | 4.157692  | 2.65539029 | 0.2472965 | 0.09313002 |
| Prex1   | ENSMUSG00000039621 | D | 2.34664858 | 2.9212426 | 2.3927607 | 0.826301 | 0.5436987 | 0.3623581 | 2.0568774 | 1.6962581 | 1.0802389 | 2.79005563 | 0.6309351 | 0.22613711 |
| S100a4  | ENSMUSG00000001020 | D | 10.6377832 | 7.8569014 | 12.057088 | 3.460516 | 7.0495585 | 3.4896866 | 8.2516476 | 12.876306 | 11.110167 | 2.30276213 | 1.0551964 | 0.45823074 |
| Mtap1b  | ENSMUSG00000052727 | D | 17.8332248 | 22.486637 | 21.687442 | 6.310086 | 9.954276  | 4.7814348 | 6.4971284 | 20.509838 | 23.09191  | 2.38046945 | 0.8079512 | 0.33940835 |
| Siva1   | ENSMUSG00000064326 | D | 5.12682222 | 4.0227084 | 3.9350108 | 2.311864 | 1.8814849 | 1.5333636 | 6.1940117 | 4.8911915 | 4.591536  | 2.73747635 | 1.1981115 | 0.43767007 |
| Phldb2  | ENSMUSG00000033149 | D | 5.13280331 | 3.6298813 | 2.8354823 | 0.814937 | 1.4393481 | 1.3704367 | 0.5103428 | 3.0915058 | 2.7950108 | 1.76478634 | 0.5515406 | 0.3125254  |
